# Supplementary material
Source: PubMed Central journal article supplement (PMC2916406)
Supplement: supp_30_15_3816__1.pdf [file supp_30_15_3816__1.pdf]

## Supplementary Tables

**Supplementary Table S1: Gene expression changes in early response to TNF- $\alpha$  stimulation. The fold changes represent gene expression differences in TNF- $\alpha$  treated cells when compared to the DMSO controls at 1 hour. Also included is the response to p38 inhibitor LY479754, represented as gene expression fold changes when cells treated with both TNF- $\alpha$  and LY479754 were compared to cells treated with TNF- $\alpha$  alone. Fold change of 1 indicated that the genes did not respond to LY479754.**

| Cluster | Gene   | Fold Changes | Gene Ontology Molecular Function Summary | Gene Ontology Biological Process Summary                           | Response to LY479754 |
|---------|--------|--------------|------------------------------------------|--------------------------------------------------------------------|----------------------|
| 1       | ATF3   | 2.56         | Transcription factor activity            | Stress and radiation;cell migration, apoptosis, proliferation      | -2.56                |
| 1       | CCNL1  | 1.61         | Cyclin L1                                | Regulation RNA Pol II by phosphorylation                           | -1.61                |
| 1       | COPEB  | 1.66         | Transcription factor activity            | Pregnancy                                                          | 1                    |
| 1       | EGR1   | 2.54         | Transcription factor activity            | Angiogenesis;stress;Apoptosis;B-cell differentiation               | -2.54                |
| 1       | EGR2   | 3            | Transcription factor activity            | Immediate early response                                           | -3                   |
| 1       | ETR101 | 2.16         | Transcription factor activity            | Cell growth and apoptosis                                          | 1                    |
| 1       | FOS    | 5.98         | Transcription factor activity            | Proto-oncogene                                                     | -5.98                |
| 1       | IER3   | 3.59         | Transcription factor activity            | Cell growth and apoptosis                                          | -1.64                |
| 1       | JUN    | 6.72         | Transcription factor activity            | Cell cycle;EGF receptor signaling;apoptosis                        | -1.49                |
| 1       | TIEG   | 1.81         | Transcription factor activity            | TGFbeta receptor signaling;Cell-cell and apoptosis signaling       | -1.81                |
|         |        |              |                                          |                                                                    |                      |
| 2       | BMP2   | 3.24         | Cytokine and growth factor activity      | Apoptosis;SMAD nuclear translocation;Osteoblast differentiation    | -1.93                |
| 2       | BTG1   | 1.41         | Transcription co-activator activity      | Regulation of cell cycle;Negative regulation of cell proliferation | -1.41                |
| 2       | CCL20  | 136.68       | Chemokine activity                       | Immediate hypersensitivity response;Activation of MAPK             | -2.53                |
| 2       | CD44   | 1.41         | Cell adhesion receptor activity          | Cell adhesion, chemotaxis, apoptosis and                           | -1.41                |

|   |        |       |                                          |                                                               |       |
|---|--------|-------|------------------------------------------|---------------------------------------------------------------|-------|
|   |        |       |                                          | polarity;Inflammation                                         |       |
| 2 | CEBPD  | 4.31  | Transcription factor activity            | Development;Acute-phase response;Inflammatory response        | -4.31 |
| 2 | CSF2   | 46.2  | GMC-stimulating factor                   | Cell migration, proliferation;JNK cascade;Anti-apoptosis      | 1     |
| 2 | CXCL1  | 40.21 | Chemokine activity                       | Angiogenesis;Immediate hypersensitivity response              | -1.84 |
| 2 | CXCL2  | 19.79 | Chemokine activity                       | Hemopoiesis;Inflammation;Chemotaxis                           | -2.2  |
| 2 | CXCL3  | 16.05 | Chemokine activity                       | Angiogenesis;Cell proliferation;Inflammatory response         | -1.86 |
| 2 | DUSP1  | 4.79  | Protein tyrosine phosphatase activity    | JNK cascade;Inactivation of MAPK                              | -2.16 |
| 2 | DUSP10 | 2.01  | MAP kinase phosphatase activity          | JNK cascade;Inactivation of MAPK                              | 1     |
| 2 | DUSP5  | 1.42  | Protein tyrosine phosphatase activity    | Cytokine/chemokine signaling;Cell growth;Inactivation of MAPK | -1.42 |
| 2 | DUSP8  | 2.62  | Protein tyrosine phosphatase activity    | Inactivation of MAPK                                          | 1     |
| 2 | EPHA2  | 1.46  | GPI-linked ephrin receptor activity      | Angiogenesis;Tyrosine kinase signaling pathway;apoptosis      | 1     |
| 2 | EREG   | 2.46  | Growth factor activity                   | Cell proliferation;EGF receptor signaling pathway             | -2.46 |
| 2 | ETS2   | 1.55  | Transcription factor activity            | Anti-apoptosis;Macrophage differentiation;RAS signaling       | -1.55 |
| 2 | FJX1   | 1.4   | Secreted protein                         | Inflammation; bacterial infection                             | -1.4  |
| 2 | IL6    | 4.93  | Interleukin-6 receptor binding           | Acute-phase response;JAK-STAT cascade;Apoptosis               | -1.84 |
| 2 | IL8    | 95.99 | Chemokine activity                       | Immediate hypersensitivity response                           | -1.42 |
| 2 | IRF1   | 2.47  | Transcription factor activity            | NO biosynthesis;JAK-STAT cascade;Inflammation;apoptosis       | 1     |
| 2 | JUNB   | 3.44  | Transcription factor activity            | Regulation of mitotic cell cycle;Cell differentiation         | -1.69 |
| 2 | LIF    | 3.68  | Growth factor activity                   | Angiogenesis;cell proliferation;Anti-apoptosis                | -1.58 |
| 2 | NFKBIA | 13.26 | Transcription factor activity            | Cytoplasmic sequestering of NF-kappaB                         | 1     |
| 2 | PTX3   | 11.61 | Protein binding                          | Inflammatory response                                         | -1.79 |
| 2 | REL    | 2.07  | Transcription factor activity            | Acute-phase response;NIK-I-kB/NF-kappaB cascade;Apoptosis     | -2.07 |
| 2 | SNARK  | 5.54  | Protein serine/threonine kinase activity | Cellular response to starvation;Cell cycle                    | 1     |
| 2 | SNK    | 1.95  | Polo-like kinase                         | Cell growth and/or maintenance;Response to radiation          | 1     |

|   |         |      |                                      |                                                                    |       |
|---|---------|------|--------------------------------------|--------------------------------------------------------------------|-------|
| 2 | TNFAIP3 | 21.7 | Protein binding                      | NIK-I-kappaB/NF-kappaB cascade                                     | -1.7  |
| 2 | UTX     | 2.29 | Transcription regulator activity     | Immune response;Cell organization and biogenesis                   | -2.29 |
| 2 | ZFP36   | 5.38 | mRNA 3' UTR binding                  | mRNA catabolism;Inflammatory response                              | -5.38 |
| 2 | ZFP36L2 | 1.4  | Transcription factor activity        | Cell proliferation;mRNA catabolism                                 | 1     |
|   |         |      |                                      |                                                                    |       |
| 3 | ADAMTS9 | 1.69 | Metalloendopeptidase activity        | Cytokine and chemokine signaling;Inflammatory response             | 1     |
| 3 | BHLHB2  | 1.8  | DNA binding                          | TGFbeta receptor signaling pathway;Skeletal development            | 1     |
| 3 | BIRC2   | 1.41 | Ubiquitin-protein ligase activity    | Anti-apoptosis;Ubiquitin-dependent protein catabolism              | -1.41 |
| 3 | BIRC3   | 6.14 | Ubiquitin-protein ligase activity    | Response to hypoxia;Protein ubiquitination;Anti-apoptosis          | 1     |
| 3 | BTG3    | 1.55 | B cell translocation                 | Regulation of cell cycle;Negative regulation of cell proliferation | -1.55 |
| 3 | CD83    | 2.52 | CD83 antigen                         | B-cell activation;Monocyte activation;Antigen presentation         | 1     |
| 3 | GEM     | 1.63 | Calmodulin binding                   | Immune response;Cell shape                                         | 1     |
| 3 | ICAM1   | 4.74 | Transmembrane receptor activity      | Cell motility;Inflammatory response;Anti-apoptosis;Chemotaxis      | 1     |
| 3 | IERS5   | 2.66 | Transcription factor activity        | Intracellular signaling cascade                                    | 1     |
| 3 | IFNGR2  | 1.58 | Interferon-gamma receptor activity   | JAK-STAT cascade;Induction of apoptosis;T-cell proliferation       | -1.58 |
| 3 | IL11    | 1.51 | Interleukin-11 receptor binding      | Acute-phase response;Cell-mediated immune response                 | -1.51 |
| 3 | INHBA   | 3.41 | TGFb receptor binding                | Epidermal differentiation;Response to wounding                     | -3.41 |
| 3 | KLRC1   | 1.61 | MHC class I receptor activity        | Negative regulation of natural killer cell activity                | -1.61 |
| 3 | LAMC2   | 2.92 | Integrin binding                     | Cell migration;Integrin-mediated signaling;Wound healing           | 1     |
| 3 | LDLR    | 2    | LD lipoprotein receptor activity     | Lipid transport;Receptor mediated endocytosis                      | 1     |
| 3 | MCL1    | 1.43 | Potassium channel regulator activity | Erythrocyte differentiation;Anti-apoptosis;B-cell differentiation  | -1.43 |

|   |            |       |                                     |                                                                     |       |
|---|------------|-------|-------------------------------------|---------------------------------------------------------------------|-------|
| 3 | NFKB2      | 2.33  | Transcription factor activity       | Immune response;NIK-I-kappaB/NF-kappaB cascade                      | -2.33 |
| 3 | NKX3-1     | 1.78  | Transcriptional repressor activity  | Cell differentiation;Male gonad development                         | -1.78 |
| 3 | PLAU       | 3.22  | Growth factor activity              | Angiogenesis;Blood coagulation;STAT translocation                   | 1     |
| 3 | SDC4       | 2.2   | Fibroblast growth factor binding    | Blood coagulation;Cell adhesion/proliferation;Inflammatory response | 1     |
| 3 | TNFAIP2    | 2.5   | Secreted protein                    | Myeloid blood cell differentiation                                  | 1     |
| 3 | TNFRSF10B  | 1.66  | Death receptor activity             | Induction of apoptosis via death domain receptors                   | -1.66 |
| 4 | DKFZp586I1 | -1.44 | ATPase activity                     | Proteolysis and peptidolysis                                        | 1.44  |
| 4 | HES1       | -1.48 | Transcriptional repressor activity  | Myeloid blood cell differentiation;B-cell differentiation           | 1     |
| 4 | HEY1       | -1.45 | Transcription factor activity       | Angiogenesis                                                        | 1.45  |
| 4 | HOXA9      | -1.44 | Transcription factor activity       | Cell differentiation;Organogenesis                                  | 1.44  |
| 4 | ID1        | -1.91 | Transcription co-repressor activity | G1/S transition of mitotic cell cycle, TGFb signaling               | 1     |
| 4 | ID2        | -1.95 | Transcription co-repressor activity | Development, TGFb signaling                                         | 1     |
| 4 | IVNS1ABP   | -1.45 | Protein binding                     | RNA splicing                                                        | 1     |
| 4 | SNCA       | -1.76 | Fatty acid transporter activity     | Response to oxidative stress;Anti-apoptosis;Induction of apoptosis  | 1     |
| 4 | ZNF131     | -1.57 | Transcription factor activity       | Cell growth and/or maintenance;Organogenesis                        | 1.57  |

**Supplementary Table S2: Gene expression changes in response to TNF- $\alpha$  and/or LY479754. A total of 853 transcripts exhibited statistically significant response to TNF- $\alpha$  (see the Results and the Methods and Materials sections for details). These transcription responses to TNF- $\alpha$  were completely, partially blocked, or not affected by LY479754. Complete response to LY479754 was determined when there is no statistically significant difference of gene expression levels in cells treated with both TNF- $\alpha$  and LY479754 compared to cells treated with vehicle at all time points, suggesting the expression changes induced by TNF- $\alpha$  were completely reversed in the presence of LY479754. Partial response to LY479754 was determined when TNF- $\alpha$  induced gene expression changes were partially reversed, or completely reversed but only at certain time points. The fold changes represent gene expression differences in TNF- $\alpha$  vs. vehicle or TNF- $\alpha$  + LY479754 vs. TNF- $\alpha$  comparisons at all 5 time points (0.5, 1, 2, 4, 7 hr). Fold change of 1 indicated that there was no statistically significant difference in the comparison.**

| probeset    | p38i<br>LY479754<br>response | Gene<br>Symbol | TNF vs.<br>vehicle<br>fold<br>change<br>0.5 hr | TNF vs.<br>vehicle<br>fold<br>change<br>1 hr | TNF vs.<br>vehicle<br>fold<br>change<br>2 hr | TNF vs.<br>vehicle<br>fold<br>change<br>4 hr | TNF vs.<br>vehicle<br>fold<br>change<br>7 hr | TNF+p38i<br>vs. TNF<br>fold<br>change<br>0.5 hr | TNF+p38i<br>vs. TNF<br>fold<br>change 1<br>hr | TNF+p38i<br>vs. TNF<br>fold<br>change 2<br>hr | TNF+p38i<br>vs. TNF<br>fold<br>change 4<br>hr | TNF+p38i<br>vs. TNF<br>fold<br>change 7<br>hr |
|-------------|------------------------------|----------------|------------------------------------------------|----------------------------------------------|----------------------------------------------|----------------------------------------------|----------------------------------------------|-------------------------------------------------|-----------------------------------------------|-----------------------------------------------|-----------------------------------------------|-----------------------------------------------|
| 201625_s_at | complete                     |                | 1                                              | 1                                            | 1.62                                         | 1                                            | 1                                            | 1                                               | 1                                             | -1.62                                         | 1                                             | 1                                             |
| 202206_at   | complete                     |                | 1                                              | 1                                            | 1                                            | -1.42                                        | 1                                            | 1                                               | 1                                             | 1                                             | 1.42                                          | 1                                             |
| 202224_at   | complete                     |                | 1                                              | 1                                            | 1                                            | 1.45                                         | 1                                            | 1                                               | 1                                             | 1                                             | -1.45                                         | 1                                             |
| 202532_s_at | complete                     |                | 1                                              | 1                                            | -1.46                                        | 1                                            | 1                                            | 1                                               | 1                                             | 1.46                                          | 1                                             | 1                                             |
| 203245_s_at | complete                     |                | 1                                              | 1                                            | -1.41                                        | 1                                            | 1                                            | 1                                               | 1                                             | 1.41                                          | 1                                             | 1                                             |
| 203636_at   | complete                     |                | 1                                              | 1                                            | 1                                            | 1                                            | -1.49                                        | 1                                               | 1                                             | 1                                             | 1                                             | 1.49                                          |
| 204823_at   | complete                     |                | 1                                              | 1                                            | 1                                            | 1.43                                         | 1                                            | 1                                               | 1                                             | 1                                             | -1.43                                         | 1                                             |
| 209600_s_at | complete                     |                | 1                                              | 1                                            | 1.54                                         | 1                                            | 1                                            | 1                                               | 1                                             | -1.54                                         | 1                                             | 1                                             |
| 210596_at   | complete                     |                | 1                                              | 1                                            | 1                                            | 1                                            | 1.54                                         | 1                                               | 1                                             | 1                                             | 1                                             | -1.54                                         |
| 211042_x_at | complete                     |                | 1                                              | 1                                            | 1                                            | 1                                            | -1.43                                        | 1                                               | 1                                             | 1                                             | 1                                             | 1.43                                          |
| 211958_at   | complete                     |                | 1                                              | 1                                            | 1                                            | 1                                            | -1.56                                        | 1                                               | 1                                             | 1                                             | 1                                             | 1.56                                          |
| 211959_at   | complete                     |                | 1                                              | 1                                            | 1                                            | 1                                            | -1.67                                        | 1                                               | 1                                             | 1                                             | 1                                             | 1.67                                          |
| 212080_at   | complete                     |                | 1                                              | 1                                            | 1                                            | 1.51                                         | 1                                            | 1                                               | 1                                             | 1                                             | -1.51                                         | 1                                             |
| 212148_at   | complete                     |                | 1                                              | 1                                            | 1                                            | 1                                            | -1.68                                        | 1                                               | 1                                             | 1                                             | 1                                             | 1.68                                          |

|             |          |                |   |       |       |       |       |   |       |       |       |       |
|-------------|----------|----------------|---|-------|-------|-------|-------|---|-------|-------|-------|-------|
| 212183_at   | complete |                | 1 | 1     | 1     | -1.85 | 1     | 1 | 1     | 1     | 1.85  | 1     |
| 212186_at   | complete |                | 1 | 1     | 1     | -1.65 | 1     | 1 | 1     | 1     | 1.65  | 1     |
| 212285_s_at | complete |                | 1 | 1     | 1     | 1.43  | 1.47  | 1 | 1     | 1     | -1.43 | -1.47 |
| 212327_at   | complete |                | 1 | 1     | 1     | 1     | -1.53 | 1 | 1     | 1     | 1     | 1.53  |
| 212328_at   | complete |                | 1 | 1     | 1     | 1     | -1.44 | 1 | 1     | 1     | 1     | 1.44  |
| 212386_at   | complete |                | 1 | 1     | 1     | 1     | -1.41 | 1 | 1     | 1     | 1     | 1.41  |
| 212462_at   | complete |                | 1 | 1     | 1     | -1.56 | -1.69 | 1 | 1     | 1     | 1.56  | 1.69  |
| 212463_at   | complete |                | 1 | 1     | 1     | 1.5   | 1     | 1 | 1     | 1     | -1.5  | 1     |
| 212666_at   | complete |                | 1 | 1     | 1     | 1     | 1.47  | 1 | 1     | 1     | 1     | -1.47 |
| 212677_s_at | complete |                | 1 | 1     | 1     | 1     | -1.44 | 1 | 1     | 1     | 1     | 1.44  |
| 212780_at   | complete |                | 1 | 1     | -1.42 | 1     | 1     | 1 | 1     | 1.42  | 1     | 1     |
| 212867_at   | complete |                | 1 | 1     | 1     | -1.45 | 1     | 1 | 1     | 1     | 1.45  | 1     |
| 212979_s_at | complete |                | 1 | 1     | 1     | 1     | -1.44 | 1 | 1     | 1     | 1     | 1.44  |
| 213435_at   | complete |                | 1 | 1     | 1     | 1.45  | 1.44  | 1 | 1     | 1     | -1.45 | -1.44 |
| 214985_at   | complete |                | 1 | 1     | 1.77  | 1     | 1     | 1 | 1     | -1.77 | 1     | 1     |
| 215716_s_at | complete |                | 1 | 1     | 1     | 1     | 1.48  | 1 | 1     | 1     | 1     | -1.48 |
| 216039_at   | complete |                | 1 | 1     | 1     | 1     | 1.46  | 1 | 1     | 1     | 1     | -1.46 |
| 216309_x_at | complete |                | 1 | -1.4  | 1     | 1     | 1     | 1 | 1.4   | 1     | 1     | 1     |
| 217631_at   | complete |                | 1 | 1.42  | 1     | 1     | 1     | 1 | -1.42 | 1     | 1     | 1     |
| 217715_x_at | complete |                | 1 | 1     | 1     | 1     | -1.63 | 1 | 1     | 1     | 1     | 1.63  |
| 218517_at   | complete |                | 1 | 1     | -1.6  | 1     | 1     | 1 | 1     | 1.6   | 1     | 1     |
| 220346_at   | complete |                | 1 | 1     | 1     | 1     | 2     | 1 | 1     | 1     | 1     | -2    |
| 220933_s_at | complete |                | 1 | 1     | 1     | 1     | 1.57  | 1 | 1     | 1     | 1     | -1.57 |
| 81811_at    | complete |                | 1 | 1     | 1     | 1     | -1.51 | 1 | 1     | 1     | 1     | 1.51  |
| 41387_r_at  | complete | 2600017<br>H02 | 1 | 1     | 1.83  | 1     | 1     | 1 | 1     | -1.83 | 1     | 1     |
| 205745_x_at | complete | ADAM17         | 1 | 1     | 1     | 1.47  | 1.5   | 1 | 1     | 1     | -1.47 | -1.5  |
| 202053_s_at | complete | ALDH3A2        | 1 | 1     | 1     | -1.41 | -1.56 | 1 | 1     | 1     | 1.41  | 1.56  |
| 202054_s_at | complete | ALDH3A2        | 1 | 1     | 1     | 1     | -1.7  | 1 | 1     | 1     | 1     | 1.7   |
| 201613_s_at | complete | AP1G2          | 1 | 1     | 1     | 1     | -1.81 | 1 | 1     | 1     | 1     | 1.81  |
| 207606_s_at | complete | ARHGAP1<br>2   | 1 | 1     | -1.49 | 1     | 1     | 1 | 1     | 1.49  | 1     | 1     |
| 212120_at   | complete | ARHQ           | 1 | -1.43 | 1     | 1     | 1     | 1 | 1.43  | 1     | 1     | 1     |
| 209788_s_at | complete | ARTS-1         | 1 | 1     | 1     | 1     | 2.24  | 1 | 1     | 1     | 1     | -2.24 |
| 202672_s_at | complete | ATF3           | 1 | 2.56  | 1.52  | 1     | 1     | 1 | -2.56 | -1.52 | 1     | 1     |
| 209281_s_at | complete | ATP2B1         | 1 | 1     | 1.51  | 1     | 1     | 1 | 1     | -1.51 | 1     | 1     |

|             |          |                |      |      |       |      |       |       |       |       |       |       |
|-------------|----------|----------------|------|------|-------|------|-------|-------|-------|-------|-------|-------|
| 212930_at   | complete | ATP2B1         | 1    | 1    | 1.41  | 1.41 | 1     | 1     | 1     | -1.41 | -1.41 | 1     |
| 201883_s_at | complete | B4GALT1        | 1    | 1    | 1     | 1.5  | 1.49  | 1     | 1     | 1     | -1.5  | -1.49 |
| 211631_x_at | complete | B4GALT1        | 1    | 1    | 1     | 1.49 | 1.62  | 1     | 1     | 1     | -1.49 | -1.62 |
| 204194_at   | complete | BACH1          | 1    | 1    | 1.77  | 1    | 1.82  | 1     | 1     | -1.77 | 1     | -1.82 |
| 217985_s_at | complete | BAZ1A          | 1    | 1    | 1.82  | 1.62 | 1     | 1     | 1     | -1.82 | -1.62 | 1     |
| 204907_s_at | complete | BCL3           | 1    | 1    | 2.52  | 2.38 | 1     | 1     | 1     | -2.52 | -2.38 | 1     |
| 218775_s_at | complete | BOMB           | 1    | 1    | 1     | 1    | 1.61  | 1     | 1     | 1     | 1     | -1.61 |
| 200920_s_at | complete | BTG1           | 1    | 1.41 | 1.7   | 1    | 1     | 1     | -1.41 | -1.7  | 1     | 1     |
| 200921_s_at | complete | BTG1           | 1    | 1    | 1.46  | 1    | 1     | 1     | 1     | -1.46 | 1     | 1     |
| 201904_s_at | complete | C3orf8         | 1    | 1    | 1     | 1    | -2.03 | 1     | 1     | 1     | 1     | 2.03  |
| 203356_at   | complete | CAPN7          | 1    | 1    | 1     | 1    | -1.43 | 1     | 1     | 1     | 1     | 1.43  |
| 203357_s_at | complete | CAPN7          | 1    | 1    | 1     | 1    | -1.4  | 1     | 1     | 1     | 1     | 1.4   |
| 203065_s_at | complete | CAV1           | 1    | 1    | 1     | 1.52 | 1     | 1     | 1     | 1     | -1.52 | 1     |
| 206724_at   | complete | CBX4           | 1    | 1    | 1     | 1    | 1.49  | 1     | 1     | 1     | 1     | -1.49 |
| 220046_s_at | complete | CCNL1          | 1    | 1.61 | 1     | 1    | 1     | 1     | -1.61 | 1     | 1     | 1     |
| 200984_s_at | complete | CD59           | 1    | 1    | 1     | 1    | 1.4   | 1     | 1     | 1     | 1     | -1.4  |
| 200985_s_at | complete | CD59           | 1    | 1    | 1     | 1.46 | 1     | 1     | 1     | 1     | -1.46 | 1     |
| 204693_at   | complete | CDC42EP<br>1   | 1    | 1    | 1     | 1    | 1.62  | 1     | 1     | 1     | 1     | -1.62 |
| 214721_x_at | complete | CDC42EP<br>4   | 1    | 1    | 1     | 1    | 1.4   | 1     | 1     | 1     | 1     | -1.4  |
| 207149_at   | complete | CDH12          | 1    | 1    | 1     | 1    | -1.53 | 1     | 1     | 1     | 1     | 1.53  |
| 211804_s_at | complete | CDK2           | 1    | 1.71 | 1     | 1    | 1     | 1     | -1.71 | 1     | 1     | 1     |
| 219049_at   | complete | ChGn           | 1    | 1    | 1     | 1.92 | 1     | 1     | 1     | 1     | -1.92 | 1     |
| 221058_s_at | complete | CKLF           | 1    | 1    | 1     | 1    | -1.41 | 1     | 1     | 1     | 1     | 1.41  |
| 202332_at   | complete | CSNK1E         | 1    | 1    | 1     | 1.64 | 1     | 1     | 1     | 1     | -1.64 | 1     |
| 211571_s_at | complete | CSPG2          | 1    | 1    | 1     | 1    | -1.59 | 1     | 1     | 1     | 1     | 1.59  |
| 214743_at   | complete | CUTL1          | 1    | 1    | 1     | 1.42 | 1     | 1     | 1     | 1     | -1.42 | 1     |
| 201289_at   | complete | CYR61          | 1.43 | 1.54 | 1     | 1    | 1     | -1.43 | -1.54 | 1     | 1     | 1     |
| 210764_s_at | complete | CYR61          | 1.57 | 1.53 | 1     | 1    | 1     | -1.57 | -1.53 | 1     | 1     | 1     |
| 209383_at   | complete | DDIT3          | 1    | 1    | 1     | 1    | 1.45  | 1     | 1     | 1     | 1     | -1.45 |
| 203699_s_at | complete | DIO2           | 1    | 1.63 | 2.03  | 1.52 | 1     | 1     | -1.63 | -2.03 | -1.52 | 1     |
| 203700_s_at | complete | DIO2           | 1    | 1    | 1.65  | 1    | 1     | 1     | 1     | -1.65 | 1     | 1     |
| 204610_s_at | complete | DIPA           | 1    | 1    | 1     | -1.7 | -1.83 | 1     | 1     | 1     | 1.7   | 1.83  |
| 212202_s_at | complete | DKFZP564<br>G2 | 1    | 1    | -1.42 | 1    | 1     | 1     | 1     | 1.42  | 1     | 1     |

|             |          |                |      |       |       |       |       |       |       |       |       |       |
|-------------|----------|----------------|------|-------|-------|-------|-------|-------|-------|-------|-------|-------|
| 207761_s_at | complete | DKFZP586<br>A0 | 1    | 1     | 1     | 1     | -1.58 | 1     | 1     | 1     | 1     | 1.58  |
| 213546_at   | complete | DKFZp586<br>I1 | 1    | -1.44 | 1     | 1     | 1     | 1     | 1.44  | 1     | 1     | 1     |
| 221924_at   | complete | DKFZp761<br>I2 | 1    | 1     | 1     | 1     | 2.94  | 1     | 1     | 1     | 1     | -2.94 |
| 218613_at   | complete | DKFZp761<br>K1 | 1    | 1     | 1     | 1.53  | 1     | 1     | 1     | 1     | -1.53 | 1     |
| 201681_s_at | complete | DLG5           | 1    | 1     | 1     | 1     | -1.44 | 1     | 1     | 1     | 1     | 1.44  |
| 215210_s_at | complete | DLST           | 1    | 1     | 1     | 1     | 1.55  | 1     | 1     | 1     | 1     | -1.55 |
| 212730_at   | complete | DMN            | 1    | 1     | 1     | -1.61 | 1     | 1     | 1     | 1     | 1.61  | 1     |
| 209457_at   | complete | DUSP5          | 1    | 1.42  | 1     | 1     | 1     | 1     | -1.42 | 1     | 1     | 1     |
| 202968_s_at | complete | DYRK2          | 1    | 1     | 1.42  | 1     | 1     | 1     | 1     | -1.42 | 1     | 1     |
| 202971_s_at | complete | DYRK2          | 1    | 1     | 1.49  | 1     | 1     | 1     | 1     | -1.49 | 1     | 1     |
| 203355_s_at | complete | EFA6R          | 1    | 1     | -1.77 | 2.94  | 1     | 1     | 1     | 1.77  | -2.94 | 1     |
| 201693_s_at | complete | EGR1           | 2.12 | 2.21  | 1     | 1     | 1     | -2.12 | -2.21 | 1     | 1     | 1     |
| 201694_s_at | complete | EGR1           | 1.89 | 2.54  | 1     | 1     | 1     | -1.89 | -2.54 | 1     | 1     | 1     |
| 205249_at   | complete | EGR2           | 1    | 3     | 1     | 1     | 1     | 1     | -3    | 1     | 1     | 1     |
| 218935_at   | complete | EHD3           | 1    | 1     | 1     | 1     | -1.7  | 1     | 1     | 1     | 1     | 1.7   |
| 210868_s_at | complete | ELOVL6         | 1    | 1     | -1.51 | 1     | 1     | 1     | 1     | 1.51  | 1     | 1     |
| 204975_at   | complete | EMP2           | 1    | 1     | 1     | 1.41  | 1     | 1     | 1     | 1     | -1.41 | 1     |
| 217820_s_at | complete | ENAH           | 1    | 1     | 1     | -1.53 | -1.52 | 1     | 1     | 1     | 1.53  | 1.52  |
| 201329_s_at | complete | ETS2           | 1    | 1.55  | 1.75  | 1.66  | 1     | 1     | -1.55 | -1.75 | -1.66 | 1     |
| 203348_s_at | complete | ETV5           | 1    | 1     | 1     | -1.66 | 1     | 1     | 1     | 1     | 1.66  | 1     |
| 221884_at   | complete | EVI1           | 1    | 1     | -1.58 | 1     | 1     | 1     | 1     | 1.58  | 1     | 1     |
| 203274_at   | complete | F8A            | 1    | 1     | -1.41 | 1     | 1     | 1     | 1     | 1.41  | 1     | 1     |
| 203980_at   | complete | FABP4          | 1    | 1     | 1     | 1     | -1.48 | 1     | 1     | 1     | 1     | 1.48  |
| 201661_s_at | complete | FACL3          | 1    | 1     | 1     | 1     | -1.51 | 1     | 1     | 1     | 1     | 1.51  |
| 220643_s_at | complete | FAIM           | 1    | 1     | 1     | 1     | -1.42 | 1     | 1     | 1     | 1     | 1.42  |
| 218255_s_at | complete | FBS1           | 1    | 1     | 1     | 1     | 1.47  | 1     | 1     | 1     | 1     | -1.47 |
| 208987_s_at | complete | FBXL11         | 1    | 1     | 1.51  | 1     | 1     | 1     | 1     | -1.51 | 1     | 1     |
| 209004_s_at | complete | FBXL5          | 1    | 1     | -1.41 | 1     | 1     | 1     | 1     | 1.41  | 1     | 1     |
| 218333_at   | complete | F-LANa         | 1    | 1     | 1     | 1     | 1.42  | 1     | 1     | 1     | 1     | -1.42 |
| 218815_s_at | complete | FLJ10199       | 1    | 1     | 1     | 1     | 1.68  | 1     | 1     | 1     | 1     | -1.68 |
| 217943_s_at | complete | FLJ10350       | 1    | 1     | 1     | 1     | 1.46  | 1     | 1     | 1     | 1     | -1.46 |
| 220134_x_at | complete | FLJ10647       | 1    | 1     | 1     | 1     | 1.52  | 1     | 1     | 1     | 1     | -1.52 |



|             |          |               |     |      |       |       |       |      |       |       |       |       |
|-------------|----------|---------------|-----|------|-------|-------|-------|------|-------|-------|-------|-------|
| 217526_at   | complete | FLJ14639      | 1   | 1    | 1     | 1.56  | 1     | 1    | 1     | 1     | -1.56 | 1     |
| 208246_x_at | complete | FLJ20006      | 1   | 1.52 | 1     | 1     | -1.52 | 1    | -1.52 | 1     | 1     | 1.52  |
| 218181_s_at | complete | FLJ20373      | 1   | 1    | 1     | 1     | 1.41  | 1    | 1     | 1     | 1     | -1.41 |
| 219128_at   | complete | FLJ20558      | 1   | 1    | 1     | -1.53 | 1     | 1    | 1     | 1     | 1.53  | 1     |
| 221705_s_at | complete | FLJ21168      | 1   | 1    | 1     | 1.94  | 1     | 1    | 1     | 1     | -1.94 | 1     |
| 220467_at   | complete | FLJ21272      | 1   | 1    | 1     | 1.42  | 1     | 1    | 1     | 1     | -1.42 | 1     |
| 219269_at   | complete | FLJ21616      | 1   | 1    | 1     | 1.47  | 1     | 1    | 1     | 1     | -1.47 | 1     |
| 222209_s_at | complete | FLJ22104      | 1   | 1    | 1     | 1     | -1.47 | 1    | 1     | 1     | 1     | 1.47  |
| 212858_at   | complete | FLJ30002      | 1   | 1    | 1     | 1     | -1.65 | 1    | 1     | 1     | 1     | 1.65  |
| 212423_at   | complete | FLJ90798      | 1   | 1    | 1     | 1     | -1.7  | 1    | 1     | 1     | 1     | 1.7   |
| 209189_at   | complete | FOS           | 3.9 | 5.98 | 1     | 1     | 1     | -3.9 | -5.98 | 1     | 1     | 1     |
| 205409_at   | complete | FOSL2         | 1   | 1    | 1.52  | 1     | 1     | 1    | 1     | -1.52 | 1     | 1     |
| 213260_at   | complete | FOXC1         | 1   | 1    | 1     | 1     | -1.62 | 1    | 1     | 1     | 1     | 1.62  |
| 210655_s_at | complete | FOXO3A        | 1   | 1    | 1.58  | 1     | 1     | 1    | 1     | -1.58 | 1     | 1     |
| 215221_at   | complete | FOXP1         | 1   | 1    | 1     | 1     | -1.45 | 1    | 1     | 1     | 1     | 1.45  |
| 210220_at   | complete | FZD2          | 1   | 1    | 1     | -1.85 | 1     | 1    | 1     | 1     | 1     | 1.85  |
| 208869_s_at | complete | GABARAP<br>L1 | 1   | 1.95 | 1     | 2.07  | 1     | 1    | -1.95 | 1     | -2.07 | 1     |
| 202721_s_at | complete | GFPT1         | 1   | 1    | 1     | 1     | 1.41  | 1    | 1     | 1     | 1     | -1.41 |
| 207966_s_at | complete | GLG1          | 1   | 1    | 1     | -1.4  | 1     | 1    | 1     | 1     | 1.4   | 1     |
| 209898_x_at | complete | GOLGA6        | 1   | 1    | 1     | 1     | 1.44  | 1    | 1     | 1     | 1     | -1.44 |
| 218361_at   | complete | GPP34R        | 1   | 1    | 1     | 1     | 1.46  | 1    | 1     | 1     | 1     | -1.46 |
| 205659_at   | complete | HDAC9         | 1   | 1    | 3.42  | 1     | 1     | 1    | 1     | -3.42 | 1     | 1     |
| 204689_at   | complete | HHEX          | 1   | 1    | 1     | 1.44  | 1     | 1    | 1     | 1     | -1.44 | 1     |
| 215933_s_at | complete | HHEX          | 1   | 1    | 1.4   | 1     | 1     | 1    | 1     | -1.4  | 1     | 1     |
| 208812_x_at | complete | HLA-C         | 1   | 1    | 1     | 1.42  | 1.42  | 1    | 1     | 1     | -1.42 | -1.42 |
| 211528_x_at | complete | HLA-G         | 1   | 1    | 1     | 1     | 1.51  | 1    | 1     | 1     | 1     | -1.51 |
| 202540_s_at | complete | HMGCR         | 1   | 1    | 1     | -1.64 | 1     | 1    | 1     | 1     | 1.64  | 1     |
| 213147_at   | complete | HOXA10        | 1   | 1    | -1.63 | 1     | 1     | 1    | 1     | 1.63  | 1     | 1     |
| 213150_at   | complete | HOXA10        | 1   | 1    | -1.67 | 1     | 1     | 1    | 1     | 1.67  | 1     | 1     |
| 214651_s_at | complete | HOXA9         | 1   | 1    | -1.45 | 1     | 1     | 1    | 1     | 1.45  | 1     | 1     |
| 214085_x_at | complete | HRB2          | 1   | 1    | 1     | 1     | 1.65  | 1    | 1     | 1     | 1     | -1.65 |
| 210253_at   | complete | HTATIP2       | 1   | 1    | 1     | 1     | -1.69 | 1    | 1     | 1     | 1     | 1.69  |
| 201193_at   | complete | IDH1          | 1   | 1    | 1     | 1     | -1.59 | 1    | 1     | 1     | 1     | 1.59  |
| 214398_s_at | complete | IKBKE         | 1   | 1    | 1     | 1     | 1.88  | 1    | 1     | 1     | 1     | -1.88 |
| 206924_at   | complete | IL11          | 1   | 1.51 | 1.52  | 1.58  | 1     | 1    | -1.51 | -1.52 | -1.58 | 1     |

|             |          |              |   |       |       |       |       |   |       |       |       |       |
|-------------|----------|--------------|---|-------|-------|-------|-------|---|-------|-------|-------|-------|
| 205798_at   | complete | IL7R         | 1 | 1     | 1.45  | 1     | 1     | 1 | 1     | -1.45 | 1     | 1     |
| 208415_x_at | complete | ING1         | 1 | 1     | 1.42  | 1     | 1     | 1 | 1     | -1.42 | 1     | 1     |
| 209808_x_at | complete | ING1         | 1 | 1     | 1.41  | 1     | 1     | 1 | 1     | -1.41 | 1     | 1     |
| 201389_at   | complete | ITGA5        | 1 | 1     | 1     | 1     | 1.72  | 1 | 1     | 1     | 1     | -1.72 |
| 209098_s_at | complete | JAG1         | 1 | 1     | 1.66  | 1     | 1     | 1 | 1     | -1.66 | 1     | 1     |
| 209099_x_at | complete | JAG1         | 1 | 1     | 1.67  | 1     | 1     | 1 | 1     | -1.67 | 1     | 1     |
| 216268_s_at | complete | JAG1         | 1 | 1     | 1.4   | 1     | 1     | 1 | 1     | -1.4  | 1     | 1     |
| 203904_x_at | complete | KAI1         | 1 | 1     | 1     | 1     | 3.98  | 1 | 1     | 1     | 1     | -3.98 |
| 204679_at   | complete | KCNK1        | 1 | 1     | 1     | 1     | 1.42  | 1 | 1     | 1     | 1     | -1.42 |
| 221584_s_at | complete | KCNMA1       | 1 | 1     | 1     | 1     | 1.76  | 1 | 1     | 1     | 1     | -1.76 |
| 212760_at   | complete | KIAA0349     | 1 | 1     | 1     | -1.41 | 1     | 1 | 1     | 1     | 1.41  | 1     |
| 203026_at   | complete | KIAA0354     | 1 | 1.42  | 1     | 1     | 1     | 1 | -1.42 | 1     | 1     | 1     |
| 212553_at   | complete | KIAA0460     | 1 | -1.56 | 1     | 1     | 1     | 1 | 1.56  | 1     | 1     | 1     |
| 212775_at   | complete | KIAA0657     | 1 | 1     | 1     | 1     | -1.65 | 1 | 1     | 1     | 1     | 1.65  |
| 205115_s_at | complete | KIAA0682     | 1 | 1     | 1     | 1     | 1.41  | 1 | 1     | 1     | 1     | -1.41 |
| 203480_s_at | complete | KIAA1046     | 1 | 1     | 1     | 1.47  | 1     | 1 | 1     | 1     | -1.47 | 1     |
| 207723_s_at | complete | KLRC3        | 1 | 1     | 1.99  | 2.06  | 1.91  | 1 | 1     | -1.99 | -2.06 | -1.91 |
| 210966_x_at | complete | LARP         | 1 | 1     | 1     | 2.39  | 1     | 1 | 1     | 1     | -2.39 | 1     |
| 212193_s_at | complete | LARP         | 1 | 1     | 1     | 2.25  | 1     | 1 | 1     | 1     | -2.25 | 1     |
| 208936_x_at | complete | LGALS8       | 1 | 1     | 1     | 1     | 1.49  | 1 | 1     | 1     | 1     | -1.49 |
| 207219_at   | complete | LOC6524<br>3 | 1 | 1     | 1     | 1.82  | 1     | 1 | 1     | 1     | -1.82 | 1     |
| 212279_at   | complete | MAC30        | 1 | 1     | 1     | 1     | -1.4  | 1 | 1     | 1     | 1     | 1.4   |
| 204970_s_at | complete | MAFG         | 1 | 1     | 1     | 1.72  | 1     | 1 | 1     | 1     | -1.72 | 1     |
| 203652_at   | complete | MAP3K11      | 1 | 1     | 1     | 1     | 1.42  | 1 | 1     | 1     | 1     | -1.42 |
| 206571_s_at | complete | MAP4K4       | 1 | 1     | 1     | 1     | 1.49  | 1 | 1     | 1     | 1     | -1.49 |
| 214047_s_at | complete | MBD4         | 1 | 1     | -1.43 | 1     | 1     | 1 | 1     | 1.43  | 1     | 1     |
| 210136_at   | complete | MBP          | 1 | 1     | -1.49 | 1     | 1     | 1 | 1     | 1.49  | 1     | 1     |
| 200797_s_at | complete | MCL1         | 1 | 1     | 1     | 1.45  | 1.64  | 1 | 1     | 1     | -1.45 | -1.64 |
| 214057_at   | complete | MCL1         | 1 | 1     | 1     | 1.58  | 1     | 1 | 1     | 1     | -1.58 | 1     |
| 201930_at   | complete | MCM6         | 1 | 1     | 1     | 1     | -1.4  | 1 | 1     | 1     | 1     | 1.4   |
| 211061_s_at | complete | MGAT2        | 1 | 1     | 1     | 1     | 1.44  | 1 | 1     | 1     | 1     | -1.44 |
| 220934_s_at | complete | MGC3196      | 1 | 1     | -1.41 | 1     | 1     | 1 | 1     | 1.41  | 1     | 1     |
| 218205_s_at | complete | MKMK2        | 1 | 1     | 1     | 1     | 1.45  | 1 | 1     | 1     | 1     | -1.45 |
| 201924_at   | complete | MLLT2        | 1 | 1     | 1     | -1.56 | -1.43 | 1 | 1     | 1     | 1.56  | 1.43  |
| 219703_at   | complete | MNS1         | 1 | 1     | 1     | -1.52 | 1     | 1 | 1     | 1     | 1.52  | 1     |

|             |          |              |   |      |       |       |       |   |       |       |       |       |
|-------------|----------|--------------|---|------|-------|-------|-------|---|-------|-------|-------|-------|
| 202519_at   | complete | MONDOA       | 1 | 1    | 1     | 1.45  | 1     | 1 | 1     | 1     | -1.45 | 1     |
| 213164_at   | complete | MRPS6        | 1 | 1    | 1     | 1     | -1.41 | 1 | 1     | 1     | 1     | 1.41  |
| 201976_s_at | complete | MYO10        | 1 | 1    | 1     | 1.42  | 1.53  | 1 | 1     | 1     | -1.42 | -1.53 |
| 212364_at   | complete | MYO1B        | 1 | 1    | 1     | 1.52  | 1     | 1 | 1     | 1     | -1.52 | 1     |
| 214656_x_at | complete | MYO1C        | 1 | 1    | 1     | 1.73  | 1     | 1 | 1     | 1     | -1.73 | 1     |
| 211685_s_at | complete | NCALD        | 1 | 1    | 1     | 1     | -1.53 | 1 | 1     | 1     | 1     | 1.53  |
| 218201_at   | complete | NDUFB2       | 1 | 1    | 1     | 1     | -1.48 | 1 | 1     | 1     | 1     | 1.48  |
| 204321_at   | complete | NEO1         | 1 | 1    | 1     | 1     | 1.42  | 1 | 1     | 1     | 1     | -1.42 |
| 203045_at   | complete | NINJ1        | 1 | 1    | 1     | 6.27  | 1     | 1 | 1     | 1     | -6.27 | 1     |
| 202379_s_at | complete | NKTR         | 1 | 1    | 1     | -1.47 | 1     | 1 | 1     | 1     | 1.47  | 1     |
| 218902_at   | complete | NOTCH1       | 1 | 1    | 1     | -1.71 | 1     | 1 | 1     | 1     | 1.71  | 1     |
| 201695_s_at | complete | NP           | 1 | 1    | 1     | 1     | 1.47  | 1 | 1     | 1     | 1     | -1.47 |
| 211671_s_at | complete | NR3C1        | 1 | 1    | 1     | 1.48  | 1     | 1 | 1     | 1     | -1.48 | 1     |
| 220035_at   | complete | NUP210       | 1 | 1    | 1     | -1.48 | -1.42 | 1 | 1     | 1     | 1.48  | 1.42  |
| 213558_at   | complete | PCLO         | 1 | 1    | 1     | 1     | -1.64 | 1 | 1     | 1     | 1     | 1.64  |
| 201202_at   | complete | PCNA         | 1 | 1    | 1     | 1     | -1.44 | 1 | 1     | 1     | 1     | 1.44  |
| 218397_at   | complete | PHF9         | 1 | 1    | 1     | 1     | -1.42 | 1 | 1     | 1     | 1     | 1.42  |
| 212542_s_at | complete | PHIP         | 1 | 1    | 1     | -1.62 | 1     | 1 | 1     | 1     | 1.62  | 1     |
| 201191_at   | complete | PITPN        | 1 | 1    | 1     | 1     | 1.44  | 1 | 1     | 1     | 1     | -1.44 |
| 204285_s_at | complete | PMAIP1       | 1 | 1    | 1.48  | 1.42  | 1     | 1 | 1     | -1.48 | -1.42 | 1     |
| 217779_s_at | complete | PNRC2        | 1 | 1    | 1     | 1.43  | 1     | 1 | 1     | 1     | -1.43 | 1     |
| 203063_at   | complete | PPM1F        | 1 | 1    | 1     | 1     | 2.13  | 1 | 1     | 1     | 1     | -2.13 |
| 201602_s_at | complete | PPP1R12<br>A | 1 | 1    | 1     | -1.72 | 1     | 1 | 1     | 1     | 1.72  | 1     |
| 202014_at   | complete | PPP1R15<br>A | 1 | 1.47 | 1     | 1     | 1     | 1 | -1.47 | 1     | 1     | 1     |
| 37028_at    | complete | PPP1R15<br>A | 1 | 1.59 | 1     | 1     | 1     | 1 | -1.59 | 1     | 1     | 1     |
| 209048_s_at | complete | PRKCBP1      | 1 | 1    | -1.52 | 1     | 1     | 1 | 1     | 1.52  | 1     | 1     |
| 205880_at   | complete | PRKCM        | 1 | 1    | 1     | 1     | -1.51 | 1 | 1     | 1     | 1     | 1.51  |
| 204748_at   | complete | PTGS2        | 1 | 2.08 | 1.49  | 1     | 1.76  | 1 | -2.08 | -1.49 | 1     | -1.76 |
| 202006_at   | complete | PTPN12       | 1 | 1    | 1     | 1.42  | 1.71  | 1 | 1     | 1     | -1.42 | -1.71 |
| 203038_at   | complete | PTPRK        | 1 | 1    | 1     | 1     | 1.55  | 1 | 1     | 1     | 1     | -1.55 |
| 213405_at   | complete | RAB22A       | 1 | 1    | 1     | 1     | 1.4   | 1 | 1     | 1     | 1     | -1.4  |
| 218669_at   | complete | RAP2C        | 1 | 1    | 1     | 1.55  | 1     | 1 | 1     | 1     | -1.55 | 1     |
| 221230_s_at | complete | RBP1L1       | 1 | 1    | 1.44  | 1     | 1     | 1 | 1     | -1.44 | 1     | 1     |

|             |          |               |   |       |       |       |       |   |       |       |       |       |
|-------------|----------|---------------|---|-------|-------|-------|-------|---|-------|-------|-------|-------|
| 211421_s_at | complete | RET           | 1 | 1     | 1     | -2    | -2.01 | 1 | 1     | 1     | 2     | 2.01  |
| 202988_s_at | complete | RGS1          | 1 | 1.46  | 1     | 1     | 1     | 1 | -1.46 | 1     | 1     | 1     |
| 203186_s_at | complete | S100A4        | 1 | 1     | 1     | 1     | -1.45 | 1 | 1     | 1     | 1     | 1.45  |
| 209146_at   | complete | SC4MOL        | 1 | 1     | 1     | -1.53 | 1     | 1 | 1     | 1     | 1.53  | 1     |
| 204030_s_at | complete | SCHIP1        | 1 | 1     | 1     | -1.61 | 1     | 1 | 1     | 1     | 1.61  | 1     |
| 200958_s_at | complete | SDCBP         | 1 | 1     | 1     | 1.44  | 1.42  | 1 | 1     | 1     | -1.44 | -1.42 |
| 212902_at   | complete | SEC24A        | 1 | 1     | 1.41  | 1     | 1     | 1 | 1     | -1.41 | 1     | 1     |
| 202375_at   | complete | SEC24D        | 1 | 1     | 1     | 1     | 1.51  | 1 | 1     | 1     | 1     | -1.51 |
| 46665_at    | complete | SEMA4C        | 1 | 1     | 1     | 1     | 1.46  | 1 | 1     | 1     | 1     | -1.46 |
| 212190_at   | complete | SERPINE2      | 1 | 1     | 1     | 1.57  | 1.51  | 1 | 1     | 1     | -1.57 | -1.51 |
| 201811_x_at | complete | SH3BP5        | 1 | 1     | 1     | 1     | -1.46 | 1 | 1     | 1     | 1     | 1.46  |
| 201469_s_at | complete | SHC1          | 1 | 1     | 1     | 1     | 1.42  | 1 | 1     | 1     | 1     | -1.42 |
| 203625_x_at | complete | SKP2          | 1 | 1     | 1     | 1     | -1.7  | 1 | 1     | 1     | 1     | 1.7   |
| 212290_at   | complete | SLC7A1        | 1 | 1     | 1.45  | 1     | 1     | 1 | 1     | -1.45 | 1     | 1     |
| 203909_at   | complete | SLC9A6        | 1 | 1     | 1     | -1.54 | 1     | 1 | 1     | 1     | 1.54  | 1     |
| 221423_s_at | complete | SMAP-5        | 1 | 1     | 1     | 1     | 1.43  | 1 | 1     | 1     | 1     | -1.43 |
| 202114_at   | complete | SNX2          | 1 | 1     | 1     | 1     | -1.67 | 1 | 1     | 1     | 1     | 1.67  |
| 212470_at   | complete | SPAG9         | 1 | 1     | 1     | 1.43  | 1     | 1 | 1     | 1     | -1.43 | 1     |
| 212061_at   | complete | SR140         | 1 | -1.49 | 1     | 1     | 1     | 1 | 1.49  | 1     | 1     | 1     |
| 202817_s_at | complete | SS18          | 1 | 1     | 1     | 1.52  | 1     | 1 | 1     | 1     | -1.52 | 1     |
| 210829_s_at | complete | SSBP2         | 1 | 1     | 1     | 1     | -2.04 | 1 | 1     | 1     | 1     | 2.04  |
| 41657_at    | complete | STK11         | 1 | 1     | 1     | 1     | 1.46  | 1 | 1     | 1     | 1     | -1.46 |
| 202693_s_at | complete | STK17A        | 1 | 1     | 1     | 1.41  | 1     | 1 | 1     | 1     | -1.41 | 1     |
| 203530_s_at | complete | STX4A         | 1 | 1     | 1     | 1     | 1.45  | 1 | 1     | 1     | 1     | -1.45 |
| 203069_at   | complete | SV2A          | 1 | 1     | 1     | -1.6  | 1     | 1 | 1     | 1     | 1.6   | 1     |
| 202566_s_at | complete | SVIL          | 1 | 1     | 1     | 1.48  | 1     | 1 | 1     | 1     | -1.48 | 1     |
| 212931_at   | complete | TCF20         | 1 | 1     | 1     | 1     | 1.54  | 1 | 1     | 1     | 1     | -1.54 |
| 203753_at   | complete | TCF4          | 1 | 1     | 1     | 1     | -1.44 | 1 | 1     | 1     | 1     | 1.44  |
| 222011_s_at | complete | TCP1          | 1 | 1     | 1     | 1     | -1.42 | 1 | 1     | 1     | 1     | 1.42  |
| 203313_s_at | complete | TGIF          | 1 | 1     | 1     | 1.42  | 1     | 1 | 1     | 1     | -1.42 | 1     |
| 218491_s_at | complete | THY28         | 1 | 1     | 1     | 1     | -1.49 | 1 | 1     | 1     | 1     | 1.49  |
| 202393_s_at | complete | TIEG          | 1 | 1.81  | 1     | 1     | 1     | 1 | -1.81 | 1     | 1     | 1     |
| 204391_x_at | complete | TIF1          | 1 | 1     | -1.43 | 1     | 1     | 1 | 1     | 1.43  | 1     | 1     |
| 204932_at   | complete | TNFRSF11<br>B | 1 | 1     | 1     | 1     | 1.53  | 1 | 1     | 1     | 1     | -1.53 |
| 204933_s_at | complete | TNFRSF11      | 1 | 1     | 1     | 1.47  | 1.66  | 1 | 1     | 1     | -1.47 | -1.66 |

|             |          | B        |   |       |       |       |       |   |       |       |       |       |
|-------------|----------|----------|---|-------|-------|-------|-------|---|-------|-------|-------|-------|
| 202871_at   | complete | TRAF4    | 1 | 1     | 1     | 1.73  | 1     | 1 | 1     | 1     | -1.73 | 1     |
| 205807_s_at | complete | TUFT1    | 1 | 1     | 1     | 1     | -1.56 | 1 | 1     | 1     | 1     | 1.56  |
| 217825_s_at | complete | UBE2J1   | 1 | 1     | 1     | 1     | 1.49  | 1 | 1     | 1     | 1     | -1.49 |
| 217727_x_at | complete | VPS35    | 1 | 1     | 1     | -1.54 | 1     | 1 | 1     | 1     | 1.54  | 1     |
| 221785_at   | complete | WIZ      | 1 | 1     | 1     | 1     | 1.65  | 1 | 1     | 1     | 1     | -1.65 |
| 205990_s_at | complete | WNT5A    | 1 | 1     | 1     | 1     | 1.6   | 1 | 1     | 1     | 1     | -1.6  |
| 202749_at   | complete | WRB      | 1 | 1     | 1     | -1.49 | 1     | 1 | 1     | 1     | 1.49  | 1     |
| 201531_at   | complete | ZFP36    | 1 | 5.38  | 1     | 1     | 1     | 1 | -5.38 | 1     | 1     | 1     |
| 214741_at   | complete | ZNF131   | 1 | -1.57 | 1     | 1     | 1     | 1 | 1.57  | 1     | 1     | 1     |
| 201626_at   | partial  |          | 1 | 1.59  | 1.88  | 1     | 1     | 1 | -1.59 | 1     | 1     | 1     |
| 201951_at   | partial  |          | 1 | 1     | 1.91  | 1.75  | 1     | 1 | 1     | -1.91 | 1     | 1     |
| 201952_at   | partial  |          | 1 | 1     | 1.55  | 1.69  | 1.68  | 1 | 1     | -1.55 | 1     | 1     |
| 202628_s_at | partial  |          | 1 | 1.51  | 2.04  | 1.96  | 2.73  | 1 | -1.51 | 1     | 1     | 1     |
| 204897_at   | partial  |          | 1 | 1.66  | 1.58  | 1     | 1     | 1 | -1.66 | 1     | 1     | 1     |
| 205430_at   | partial  |          | 1 | 1     | 2.45  | 2.36  | 1     | 1 | 1     | -2.45 | 1     | 1     |
| 208079_s_at | partial  |          | 1 | 1     | -1.4  | 1     | 1     | 1 | 1     | 1.4   | 1     | 1     |
| 210355_at   | partial  |          | 1 | 1.63  | 1     | 1     | 1     | 1 | -1.63 | 1     | 1     | 1     |
| 213844_at   | partial  |          | 1 | -1.77 | -2.24 | 1     | 1     | 1 | 1.77  | 1     | 1     | 1     |
| 216035_x_at | partial  |          | 1 | 1     | 1     | -1.43 | 1     | 1 | 1     | 1     | 1     | 1     |
| 217419_x_at | partial  |          | 1 | 1     | 1     | 1.42  | 1.49  | 1 | 1     | 1     | 1     | -1.49 |
| 217738_at   | partial  |          | 1 | 1     | 1     | 1.49  | 1.66  | 1 | 1     | 1     | -1.49 | 1     |
| 218880_at   | partial  |          | 1 | 1     | 1.85  | 1.46  | 1     | 1 | 1     | 1     | -1.46 | 1     |
| 222001_x_at | partial  |          | 1 | 1     | 1     | 1.65  | 1.71  | 1 | 1     | 1     | -1.65 | 1     |
| 36711_at    | partial  |          | 1 | 3.51  | 4.99  | 3.06  | 2.17  | 1 | -1.68 | 1     | 1     | -2.17 |
| 202912_at   | partial  | ADM      | 1 | 1.61  | 1     | -1.7  | -1.77 | 1 | -1.61 | 1     | 1     | 1     |
| 64488_at    | partial  | AF322649 | 1 | 1.67  | 1.44  | 1.65  | 1     | 1 | -1.67 | 1     | 1     | 1.45  |
| 221215_s_at | partial  | ANKRD3   | 1 | 1     | 1     | 1.88  | 1.94  | 1 | 1     | 1     | 1     | -1.94 |
| 216627_s_at | partial  | B4GALT1  | 1 | 1     | 1     | 1.82  | 1.83  | 1 | 1     | 1     | -1.82 | 1     |
| 217986_s_at | partial  | BAZ1A    | 1 | 1     | 1.52  | 1.6   | 1     | 1 | 1     | -1.52 | 1     | 1     |
| 203140_at   | partial  | BCL6     | 1 | 1     | 1     | -1.49 | 1     | 1 | 1     | 1     | 1     | 1     |
| 206382_s_at | partial  | BDNF     | 1 | 1     | -1.54 | -2    | 1     | 1 | 1     | 1     | 2     | 1     |
| 204493_at   | partial  | BID      | 1 | 1     | 1.53  | 2.2   | 2.6   | 1 | 1     | -1.53 | 1     | 1     |
| 202076_at   | partial  | BIRC2    | 1 | 1.41  | 2.51  | 2.96  | 2.8   | 1 | -1.41 | 1     | 1     | 1     |
| 205289_at   | partial  | BMP2     | 1 | 2.62  | 4.88  | 3.36  | 2.11  | 1 | -2.62 | -1.7  | 1     | -2.11 |
| 205290_s_at | partial  | BMP2     | 1 | 3.24  | 5.61  | 2.74  | 2.81  | 1 | -1.93 | -2.06 | 1     | 1     |

|             |         |                |       |        |        |       |       |       |       |       |       |       |
|-------------|---------|----------------|-------|--------|--------|-------|-------|-------|-------|-------|-------|-------|
| 205548_s_at | partial | BTG3           | 1     | 1.49   | 1.87   | 1.71  | 1.48  | 1     | -1.49 | 1     | 1     | -1.48 |
| 213134_x_at | partial | BTG3           | 1     | 1.55   | 2.38   | 1.89  | 2.08  | 1     | -1.55 | 1     | 1     | -2.08 |
| 221766_s_at | partial | C6orf37        | 1     | -1.49  | 1      | 1     | 1     | 1     | 1     | 1     | 1     | 1     |
| 218541_s_at | partial | C8orf4         | 1     | 2.67   | 2.92   | 2.76  | 2.66  | 1     | -2.67 | 1     | -2.76 | -2.66 |
| 205476_at   | partial | CCL20          | 1     | 136.68 | 184.11 | 47.35 | 1     | 1     | -2.53 | 1     | 1     | 1     |
| 211559_s_at | partial | CCNG2          | 1     | 1      | 1      | 1.99  | 1     | 1     | 1     | 1     | -1.99 | 1.5   |
| 217523_at   | partial | CD44           | 1     | 1.41   | 1.51   | 1     | 1     | 1     | -1.41 | 1     | 1     | 1     |
| 206898_at   | partial | CDH19          | 1     | 1      | 1      | 1.49  | 1.47  | 1     | 1     | 1     | -1.49 | 1     |
| 202284_s_at | partial | CDKN1A         | 1     | 1      | 2.5    | 2.09  | 3.89  | 1     | 1     | -2.5  | 1     | 1     |
| 203973_s_at | partial | CEBPD          | 1     | 4.31   | 6.79   | 2.93  | 1     | 1     | -4.31 | -1.61 | 1     | 1     |
| 219634_at   | partial | CHST11         | 1     | 1      | 1      | 1.54  | 1.97  | 1     | 1     | 1     | -1.54 | 1     |
| 207980_s_at | partial | CITED2         | 1     | 1      | -1.86  | -2.45 | 1     | 1     | 1     | 1     | 2.45  | 1     |
| 209357_at   | partial | CITED2         | 1     | 1      | -2.2   | -2.19 | 1     | 1     | 1     | 1     | 2.19  | 1     |
| 204136_at   | partial | COL7A1         | 1     | 1      | 1      | 1.41  | 1.78  | 1     | 1     | 1     | -1.41 | 1     |
| 208960_s_at | partial | COPEB          | 1.41  | 1.66   | 1      | 1     | 1     | -1.41 | 1     | 1.48  | 1     | 1     |
| 204313_s_at | partial | CREB1          | 1     | 1      | 1.43   | 1     | 1     | 1     | 1     | -1.43 | 1.58  | 1     |
| 204314_s_at | partial | CREB1          | 1     | 1      | 1.52   | 1.41  | 1     | 1     | 1     | -1.52 | 1     | 1     |
| 204470_at   | partial | CXCL1          | 1     | 40.21  | 14.82  | 8.77  | 1     | 9.22  | -1.84 | 1     | -8.77 | 1     |
| 209774_x_at | partial | CXCL2          | 11.83 | 19.78  | 12.23  | 4.79  | 4.25  | -1.54 | -2.2  | 1     | 1     | -4.25 |
| 207850_at   | partial | CXCL3          | 6.43  | 16.05  | 6.98   | 6.51  | 4.65  | 1     | -1.86 | 1     | 1     | -4.65 |
| 221903_s_at | partial | CYLD           | 1     | 1      | 1      | 2.73  | 2.46  | 1     | 1     | 1     | 1     | -2.46 |
| 218819_at   | partial | DDX26          | 1     | 1      | 1      | 1     | -1.4  | 1     | 1     | 1     | 1     | 1.4   |
| 212665_at   | partial | DKFZP434<br>J2 | 1     | 1      | -1.48  | 1     | 1     | 1     | 1     | 1     | 1     | 1     |
| 218149_s_at | partial | DKFZp434<br>K1 | 1     | 1      | 1      | -1.7  | -1.58 | 1     | 1     | 1     | 1     | 1.58  |
| 204602_at   | partial | DKK1           | 1     | 1      | 1      | -1.95 | -2.15 | 1     | 1     | 1     | 1.41  | 1     |
| 205677_s_at | partial | DLEU1          | 1     | 1      | 1      | 1     | -1.41 | 1     | 1     | 1     | 1     | 1     |
| 203810_at   | partial | DNAJB4         | 1     | 1      | 1      | -1.8  | -1.62 | 1     | 1     | 1     | 1     | 1.62  |
| 202842_s_at | partial | DNAJB9         | 1     | 1      | 1      | 1.81  | 2.22  | 1     | 1     | 1     | -1.81 | 1     |
| 201627_s_at | partial | DPP6           | 1     | 1.49   | 1.83   | 1     | 1     | 1     | -1.49 | -1.83 | 1     | 1.4   |
| 201041_s_at | partial | DUSP1          | 2.64  | 4.79   | 1.57   | 1     | 1     | -1.84 | -2.16 | 1     | 1     | 1     |
| 221563_at   | partial | DUSP10         | 1     | 2.02   | 2.06   | 1.73  | 1     | 1     | 1     | 1     | -1.73 | 1     |
| 202668_at   | partial | EFNB2          | 1     | 1      | 1      | -1.42 | -1.49 | 1     | 1     | 1     | 1     | 1     |
| 201983_s_at | partial | EGFR           | 1     | 1      | 1.54   | 1     | 1     | 1     | 1     | -1.54 | 1.43  | 1     |
| 201984_s_at | partial | EGFR           | 1     | 1      | 1      | 1.46  | 1.49  | 1     | 1     | 1     | 1     | -1.49 |

|             |         |               |       |       |        |       |       |   |       |       |       |        |
|-------------|---------|---------------|-------|-------|--------|-------|-------|---|-------|-------|-------|--------|
| 205767_at   | partial | EREG          | 1     | 2.46  | 2.09   | 1     | 1     | 1 | -2.46 | 1     | 1     | 1      |
| 222303_at   | partial | ETS2          | 1     | 1.99  | 1.77   | 1     | 1     | 1 | -1.99 | -1.77 | 2.03  | 1      |
| 218618_s_at | partial | FAD104        | 1     | 1     | 1      | 1.71  | 1.62  | 1 | 1     | 1     | 1     | -1.62  |
| 219522_at   | partial | FJX1          | 1     | 1.4   | 1.57   | 1     | 1     | 1 | -1.4  | 1     | 1     | 1      |
| 219901_at   | partial | FLJ11183      | 1     | 1     | 1      | 1     | 2.2   | 1 | 1     | 1     | 2.44  | -2.2   |
| 218710_at   | partial | FLJ20272      | 1     | 1     | 1      | 1.41  | 1     | 1 | 1     | 1     | -1.41 | 1.56   |
| 220468_at   | partial | FLJ22595      | 1     | 2.4   | 3.87   | 1     | 1     | 1 | -2.4  | -1.44 | 1     | 1      |
| 219474_at   | partial | FLJ23186      | 1     | 1     | 1.53   | 1.53  | 1.51  | 1 | 1     | -1.53 | 1     | -1.51  |
| 219250_s_at | partial | FLRT3         | 1     | 1     | -1.65  | -1.92 | -1.64 | 1 | 1     | 1.65  | 1     | 1      |
| 202724_s_at | partial | FOXO1A        | 1     | 1     | 2.28   | 1.99  | 1     | 1 | 1     | -2.28 | 1     | 1      |
| 203705_s_at | partial | FZD7          | 1     | 1     | -1.51  | 1     | 1     | 1 | 1     | 1     | 1     | 1      |
| 203706_s_at | partial | FZD7          | 1     | -1.49 | -1.72  | 1     | 1     | 1 | 1.49  | 1     | 1     | 1      |
| 211458_s_at | partial | GABARAP<br>L1 | 1     | 1.72  | 1.61   | 2.12  | 1     | 1 | -1.72 | 1     | -2.12 | 1      |
| 207014_at   | partial | GABRA2        | 1     | 1     | 2.07   | 1.46  | 1.73  | 1 | 1     | -1.47 | 1     | 1      |
| 204222_s_at | partial | GLIPR1        | 1     | 1     | 1.74   | 1.63  | 1.7   | 1 | 1     | 1     | -1.63 | -1.7   |
| 213880_at   | partial | GPR49         | 1     | 1     | 1      | -1.82 | -2.67 | 1 | 1     | 1     | 1.82  | -1.75  |
| 206432_at   | partial | HAS2          | 1     | 1     | -1.41  | -1.81 | 1     | 1 | 1     | 1.57  | 1.47  | 1      |
| 217168_s_at | partial | HERPUD1       | 1     | 1     | 1      | 2.72  | 3.59  | 1 | 1     | 1     | -1.54 | 1      |
| 44783_s_at  | partial | HEY1          | 1     | -1.45 | -1.98  | -1.63 | -1.5  | 1 | 1.45  | 1     | 1.63  | 1      |
| 202814_s_at | partial | HIS1          | 1     | 1     | 1      | -1.86 | 1     | 1 | 1     | 1     | 1     | 1      |
| 204512_at   | partial | HIVEP1        | 1     | 1     | 2.01   | 1.59  | 1.48  | 1 | 1     | 1     | 1     | -1.48  |
| 212641_at   | partial | HIVEP2        | 1     | 1     | 2.53   | 2.28  | 2.52  | 1 | 1     | 1     | 1     | -2.52  |
| 209905_at   | partial | HOXA9         | 1     | -1.44 | -1.75  | 1     | 1     | 1 | 1.44  | 1     | 1     | 1      |
| 208937_s_at | partial | ID1           | 1     | -1.91 | 1      | 1     | 1     | 1 | 1     | 1     | 1     | 1      |
| 201565_s_at | partial | ID2           | 1     | -1.52 | -1.55  | -1.51 | -1.54 | 1 | 1     | 1     | 1     | 1      |
| 207826_s_at | partial | ID3           | 1     | 1     | 1      | -1.44 | 1     | 1 | 1     | 1     | 1     | 1      |
| 201631_s_at | partial | IER3          | 1.81  | 3.59  | 2.43   | 1.71  | 1.89  | 1 | -1.64 | 1     | 1     | 1      |
| 201642_at   | partial | IFNGR2        | 1     | 1.58  | 3.22   | 3.66  | 2.58  | 1 | -1.58 | 1     | 1     | 1      |
| 203233_at   | partial | IL4R          | 1     | 1     | 1      | 1.54  | 1.76  | 1 | 1     | 1     | 1     | -1.76  |
| 205207_at   | partial | IL6           | 1     | 4.93  | 4.54   | 2.26  | 1     | 1 | -1.84 | 1     | -2.26 | 1      |
| 204863_s_at | partial | IL6ST         | 1     | 1     | 1.65   | 1.93  | 1     | 1 | 1     | -1.65 | 1     | 2.11   |
| 204864_s_at | partial | IL6ST         | 1     | 1     | 1.86   | 1     | 1.93  | 1 | 1     | -1.86 | 1.62  | 1      |
| 211000_s_at | partial | IL6ST         | 1     | 1     | 1.63   | 1     | 1.95  | 1 | 1     | -1.63 | 1.6   | 1      |
| 202859_x_at | partial | IL8           | 20.11 | 95.99 | 92.43  | 84.31 | 36.74 | 1 | -1.42 | 1     | 1     | -1.74  |
| 211506_s_at | partial | IL8           | 1     | 90.68 | 120.64 | 61.05 | 26.44 | 1 | -2.05 | 1     | 1     | -26.44 |

|             |         |              |      |      |       |       |       |       |       |       |       |       |
|-------------|---------|--------------|------|------|-------|-------|-------|-------|-------|-------|-------|-------|
| 210511_s_at | partial | INHBA        | 1    | 3.41 | 5.7   | 11.79 | 12.05 | 1     | -3.41 | -1.8  | -1.89 | -1.73 |
| 204686_at   | partial | IRS1         | 1    | 1    | -1.45 | -1.63 | -1.54 | 1     | 1     | 1.45  | 1     | 1     |
| 202351_at   | partial | ITGAV        | 1    | 1    | 1.41  | 1.63  | 1.62  | 1     | 1     | -1.41 | 1     | 1     |
| 201466_s_at | partial | JUN          | 3.78 | 8.14 | 1     | 1     | 1     | 1     | -1.49 | 2.8   | 1     | 1     |
| 201473_at   | partial | JUNB         | 1    | 3.44 | 2.57  | 2.27  | 2.5   | 1     | -1.69 | 1     | 1     | 1     |
| 204401_at   | partial | KCNN4        | 1    | 1    | 1     | -1.51 | -1.43 | 1     | 1     | 1     | 1.51  | 1     |
| 212110_at   | partial | KIAA0062     | 1    | 1    | 1     | 1.52  | 1.87  | 1     | 1     | 1     | -1.52 | 1     |
| 203068_at   | partial | KIAA0469     | 1    | 1    | 1     | 2.72  | 3.42  | 1     | 1     | 1     | 1     | -3.42 |
| 204094_s_at | partial | KIAA0669     | 1    | 1    | 1     | -1.57 | -1.53 | 1     | 1     | 1     | 1     | 1     |
| 203051_at   | partial | KIAA0945     | 1.46 | 1    | 1     | 1     | 1     | -1.46 | 1     | 1     | 1     | 1     |
| 218418_s_at | partial | KIAA1518     | 1    | 1    | 1     | 1     | -1.45 | 1     | 1     | 1     | 1     | 1     |
| 213085_s_at | partial | KIBRA        | 1    | 1    | 1     | 1.69  | 1.78  | 1     | 1     | 1     | 1     | -1.78 |
| 206785_s_at | partial | KLRC1        | 1    | 1.61 | 2.11  | 2.93  | 3.25  | 1     | -1.61 | 1     | 1     | 1     |
| 210663_s_at | partial | KYNU         | 1    | 1    | 1     | 2.64  | 1.75  | 1     | 1     | 1     | 1     | -1.75 |
| 217388_s_at | partial | KYNU         | 1    | 1    | 1     | 1.82  | 2.89  | 1     | 1     | 1     | -1.82 | -1.53 |
| 200771_at   | partial | LAMC1        | 1    | 1    | 1     | 1.43  | 1.5   | 1     | 1     | 1     | 1     | -1.5  |
| 221011_s_at | partial | LBH          | 1    | 1    | 1     | -2.01 | -1.87 | 1     | 1     | 1     | 1     | 1.87  |
| 202068_s_at | partial | LDLR         | 1    | 1.43 | 1     | 1     | 1     | 1     | -1.43 | 1.53  | 1     | 1     |
| 218656_s_at | partial | LHFP         | 1    | 1    | 1     | 1.57  | 1.6   | 1     | 1     | 1     | 1     | -1.6  |
| 205266_at   | partial | LIF          | 1    | 3.68 | 3.59  | 3.38  | 3.02  | 1     | -1.58 | 1     | 1     | 1     |
| 200706_s_at | partial | LITAF        | 1    | 1    | 1     | 1.45  | 1.46  | 1     | 1     | 1     | -1.45 | 1     |
| 57715_at    | partial | LOC5106<br>3 | 1    | 1    | 1     | -1.6  | -1.55 | 1     | 1     | 1     | 1.6   | 1     |
| 205398_s_at | partial | MADH3        | 1    | 1    | 1.48  | 2.37  | 2.33  | 1     | 1     | -1.48 | 1     | 1     |
| 200798_x_at | partial | MCL1         | 1    | 1.43 | 1     | 1.47  | 1.59  | 1     | -1.43 | 1     | -1.47 | 1     |
| 213457_at   | partial | MFHAS1       | 1    | 1    | 1.84  | 1.54  | 1.49  | 1     | 1     | 1     | 1     | -1.49 |
| 214023_x_at | partial | MGC8685      | 1    | 1.45 | 1.75  | 2.02  | 1.63  | 1     | -1.45 | 1     | 1     | 1     |
| 212944_at   | partial | MRPS6        | 1    | 1    | 1     | -1.43 | 1     | 1     | 1     | 1     | 1.43  | 1     |
| 202907_s_at | partial | NBS1         | 1    | 1    | 1     | 1     | 1.47  | 1     | 1     | 1     | 1.54  | -1.47 |
| 212445_s_at | partial | NEDD4L       | 1    | 1    | 1.67  | 2.05  | 1.42  | 1     | 1     | -1.67 | 1     | 1     |
| 207535_s_at | partial | NFKB2        | 1    | 2.33 | 2.95  | 4.51  | 5.12  | 1     | -2.33 | 1     | 1     | 1     |
| 203927_at   | partial | NFKBIE       | 1    | 1    | 3.13  | 2.91  | 2.38  | 1     | 1     | 1     | 1     | -2.38 |
| 209706_at   | partial | NKX3-1       | 1    | 1.78 | 2.17  | 2.1   | 1.56  | 1     | -1.78 | 1     | 1     | 1     |
| 209121_x_at | partial | NR2F2        | 1    | 1    | 1     | -1.4  | -1.68 | 1     | 1     | 1     | 1.4   | 1     |
| 217739_s_at | partial | PBEF         | 1    | 1    | 1     | 1.7   | 1.66  | 1     | 1     | 1     | 1     | -1.66 |
| 205534_at   | partial | PCDH7        | 1    | 1    | 1     | -1.47 | 1     | 1     | 1     | 1     | 1     | 1     |



|             |         |          |      |       |       |       |       |   |       |       |       |       |
|-------------|---------|----------|------|-------|-------|-------|-------|---|-------|-------|-------|-------|
| 213228_at   | partial | PDE8B    | 1    | 1     | 1     | -1.55 | -1.86 | 1 | 1     | 1     | 1.55  | 1     |
| 213227_at   | partial | PGRMC2   | 1    | 1     | 1     | -1.51 | 1     | 1 | 1     | 1     | 1     | 1     |
| 217997_at   | partial | PHLDA1   | 1    | 1.5   | 1     | 1     | 1     | 1 | -1.5  | 1     | 1     | 1     |
| 207558_s_at | partial | PITX2    | 1    | 1     | -1.62 | 1     | -1.54 | 1 | 1     | 1.62  | 1     | 1     |
| 219014_at   | partial | PLAC8    | 1    | 1     | 1     | 1     | -1.4  | 1 | 1     | 1     | 1     | 1     |
| 205479_s_at | partial | PLAU     | 1    | 2.51  | 3.87  | 2.56  | 1.88  | 1 | -1.46 | 1     | 1     | 1     |
| 211924_s_at | partial | PLAUR    | 1    | 1     | 1     | 1.46  | 2.03  | 1 | 1     | 1     | -1.46 | 1     |
| 204286_s_at | partial | PMAIP1   | 1    | 1.47  | 1     | 1     | 1     | 1 | -1.47 | 1     | 1.58  | 1     |
| 209355_s_at | partial | PPAP2B   | 1    | 1     | 1.79  | 1.85  | 1.79  | 1 | 1     | -1.79 | 1     | 1     |
| 212226_s_at | partial | PPAP2B   | 1    | 1     | 1.58  | 1.69  | 1.86  | 1 | 1     | -1.58 | 1     | 1     |
| 201489_at   | partial | PPIF     | 1    | 1     | 1     | 1.47  | 1.72  | 1 | 1     | 1     | -1.47 | 1     |
| 206157_at   | partial | PTX3     | 2.27 | 11.61 | 14.39 | 13.69 | 7.52  | 1 | -1.79 | 1     | 1     | 1     |
| 212444_at   | partial | RAI3     | 1    | 1     | 1     | 1     | -2.06 | 1 | 1     | 1     | 1     | 1     |
| 206036_s_at | partial | REL      | 1    | 2.07  | 2.76  | 1     | 1     | 1 | -2.07 | 1     | 1     | 1     |
| 202388_at   | partial | RGS2     | 1    | -1.74 | -1.77 | -2.04 | -1.9  | 1 | 1.74  | 1     | 1     | 1     |
| 203286_at   | partial | RNF44    | 1    | 1     | 1     | 1.49  | 1.49  | 1 | 1     | 1     | 1     | -1.49 |
| 202449_s_at | partial | RXRA     | 1    | 1     | -1.62 | -1.67 | -1.48 | 1 | 1     | 1.62  | 1     | 1.48  |
| 218681_s_at | partial | SDF2L1   | 1    | 1     | 1     | 1.89  | 2.58  | 1 | 1     | 1     | -1.89 | 1     |
| 203788_s_at | partial | SEMA3C   | 1    | 1     | 1     | 1.4   | 1.52  | 1 | 1     | 1     | -1.4  | 1     |
| 203789_s_at | partial | SEMA3C   | 1    | 1     | 1.43  | 1.66  | 1.62  | 1 | 1     | -1.43 | 1     | -1.62 |
| 204614_at   | partial | SERPINB2 | 1    | 1     | 2.8   | 3.43  | 6.72  | 1 | 1     | -2.8  | -3.43 | -2.03 |
| 218066_at   | partial | SLC12A7  | 1    | 1.49  | 2.45  | 2.52  | 1.79  | 1 | -1.49 | 1     | 1     | 1     |
| 201920_at   | partial | SLC20A1  | 1    | 1     | 1     | -1.5  | 1     | 1 | 1     | 1     | 1     | 1     |
| 204204_at   | partial | SLC31A2  | 1    | 1     | 1     | 1     | 1.59  | 1 | 1     | 1     | 1.81  | -1.59 |
| 220987_s_at | partial | SNARK    | 1    | 5.54  | 5.34  | 2.71  | 1.85  | 1 | 1     | 1     | 1     | -1.85 |
| 204467_s_at | partial | SNCA     | 1    | 1     | 1     | -1.72 | -2.08 | 1 | 1     | 1     | 1     | 1     |
| 201939_at   | partial | SNK      | 1    | 1.95  | 2.56  | 1.76  | 1.74  | 1 | 1     | 1     | 1     | -1.74 |
| 219257_s_at | partial | SPHK1    | 1    | 1     | 1     | 1.58  | 2.09  | 1 | 1     | 1     | -1.58 | 1     |
| 201471_s_at | partial | SQSTM1   | 1    | 1     | 1.52  | 2.05  | 1.81  | 1 | 1     | -1.52 | 1     | 1     |
| 213112_s_at | partial | SQSTM1   | 1    | 1     | 6.04  | 4.34  | 3.29  | 1 | 1     | -6.04 | 1     | 1     |
| 202506_at   | partial | SSFA2    | 1    | 1     | 1     | -1.4  | 1     | 1 | 1     | 1     | 1     | 1     |
| 208991_at   | partial | STAT3    | 1    | 1     | 1     | 1.89  | 1.6   | 1 | 1     | 1     | 1     | -1.6  |
| 209451_at   | partial | TANK     | 1    | 1     | 1     | 1     | 1.95  | 1 | 1     | 1     | 2.21  | -1.95 |
| 208829_at   | partial | TAPBP    | 1    | 1     | 1.53  | 2.91  | 2.68  | 1 | 1     | -1.53 | 1     | 1     |
| 212762_s_at | partial | TCF7L2   | 1    | 1     | 1     | -1.54 | 1     | 1 | 1     | 1     | 1.54  | 1     |
| 217853_at   | partial | TENS1    | 1    | 1     | 1     | 1     | 1.53  | 1 | 1     | 1     | 1.5   | -1.53 |

|             |             |               |       |       |       |       |       |   |       |       |       |       |
|-------------|-------------|---------------|-------|-------|-------|-------|-------|---|-------|-------|-------|-------|
| 205016_at   | partial     | TGFA          | 1     | 1     | 1     | -1.47 | 1     | 1 | 1     | 1     | 1     | 1     |
| 220407_s_at | partial     | TGFB2         | 1     | 1     | 1.56  | 1     | -1.51 | 1 | 1     | -1.56 | 1     | 1     |
| 216262_s_at | partial     | TGIF2         | 1     | 1     | 1.49  | 1.4   | 1     | 1 | 1     | 1     | -1.4  | 1     |
| 218724_s_at | partial     | TGIF2         | 1     | 1     | 1.46  | 1     | 1     | 1 | 1     | -1.46 | 1.52  | 1     |
| 201110_s_at | partial     | THBS1         | 1     | 1     | 1     | 1     | -1.99 | 1 | 1     | 1     | 1     | 1.71  |
| 201645_at   | partial     | TNC           | 1     | 1     | 1     | 1.42  | 2     | 1 | 1     | 1     | -1.42 | 1     |
| 202643_s_at | partial     | TNFAIP3       | 3.73  | 11.66 | 9.6   | 7.75  | 6.08  | 1 | -1.82 | -1.43 | 1     | 1     |
| 202644_s_at | partial     | TNFAIP3       | 3.6   | 21.7  | 20.84 | 14.84 | 11.95 | 1 | -1.7  | 1     | 1     | 1     |
| 209295_at   | partial     | TNFRSF10<br>B | 1     | 1.66  | 2.64  | 2.62  | 2.21  | 1 | -1.66 | 1     | 1     | 1     |
| 214581_x_at | partial     | TNFRSF21      | 1     | 1     | 1     | -1.55 | -1.58 | 1 | 1     | 1     | 1     | 1.58  |
| 202704_at   | partial     | TOB1          | 1     | 1     | -1.63 | 1     | 1     | 1 | 1     | 1     | 1     | 1     |
| 204140_at   | partial     | TPST1         | 1     | 1     | 1     | 1.5   | 1.41  | 1 | 1     | 1     | -1.5  | 1     |
| 217959_s_at | partial     | TRAPPC4       | 1     | 1     | 1     | 1     | -1.58 | 1 | 1     | 1     | 1     | 1.58  |
| 202478_at   | partial     | TRB2          | 1     | 1     | -1.63 | -1.43 | -1.56 | 1 | 1     | 1.63  | 1.43  | 1     |
| 204141_at   | partial     | TUBB          | 1     | 1     | 1.43  | 1     | 1     | 1 | 1     | -1.43 | 1.48  | 1     |
| 213146_at   | partial     | UTX           | 1     | 2.29  | 3.2   | 1.81  | 1     | 1 | -2.29 | -1.48 | -1.81 | 1     |
| 41386_i_at  | partial     | UTX           | 1     | 1.94  | 3.96  | 1.41  | 1.57  | 1 | -1.94 | -1.44 | 1     | -1.57 |
| 204255_s_at | partial     | VDR           | 1     | 1     | 1     | 1     | 1.49  | 1 | 1     | 1     | 1.48  | -1.49 |
| 205926_at   | partial     | WSX1          | 1     | 1     | 1     | 2.29  | 2.22  | 1 | 1     | 1     | -2.29 | 1     |
| 201749_at   | no response |               | 1     | 1     | 1     | 1.93  | 2.38  | 1 | 1     | 1     | 1     | 1     |
| 202214_s_at | no response |               | 1     | 1     | 1     | 1     | -1.59 | 1 | 1     | 1     | 1     | 1     |
| 202421_at   | no response |               | 1     | 1     | 1     | 1.43  | 1.46  | 1 | 1     | 1     | 1     | 1     |
| 202627_s_at | no response |               | 1     | 1     | 1.56  | 1.82  | 1.63  | 1 | 1     | 1     | 1     | 1     |
| 204573_at   | no response |               | -2.23 | 1     | 1     | 1     | 1     | 1 | 1     | 1     | 1     | 1     |
| 204656_at   | no response |               | 1     | 1     | 1     | 1.4   | 1     | 1 | 1     | 1     | 1     | 1     |
| 205003_at   | no response |               | 1     | 1     | 1     | 2.28  | 2.22  | 1 | 1     | 1     | 1     | 1     |
| 205070_at   | no response |               | 1     | 1     | 1     | -1.67 | 1     | 1 | 1     | 1     | 1     | 1     |
| 205501_at   | no response |               | 1     | 1     | 1     | 1     | 2.02  | 1 | 1     | 1     | 1     | 1     |
| 209011_at   | no response |               | 1     | 1     | 1     | 1.47  | 1.55  | 1 | 1     | 1     | 1     | 1     |
| 209012_at   | no response |               | 1     | 1     | 1     | 1.75  | 1.64  | 1 | 1     | 1     | 1     | 1     |
| 209031_at   | no response |               | 1     | 1     | 1     | 1     | 1.97  | 1 | 1     | 1     | 1     | 1     |
| 209185_s_at | no response |               | 1     | 1     | 1     | -1.55 | -1.69 | 1 | 1     | 1     | 1     | 1     |
| 209544_at   | no response |               | 1     | 1     | 1     | 2.08  | 1     | 1 | 1     | 1     | 1     | 1     |
| 209716_at   | no response |               | 1     | 1     | 3.97  | 4.34  | 2.86  | 1 | 1     | 1     | 1.5   | 1     |
| 209939_x_at | no response |               | 1     | 1     | 1     | 1     | 1.48  | 1 | 1     | 1     | 1     | 1     |

|             |             |         |   |      |      |       |       |   |   |      |      |      |
|-------------|-------------|---------|---|------|------|-------|-------|---|---|------|------|------|
| 211031_s_at | no response |         | 1 | 1    | 1    | 1.82  | 2.32  | 1 | 1 | 1    | 1.48 | 1    |
| 212040_at   | no response |         | 1 | 1    | 1    | 2.24  | 1     | 1 | 1 | 1    | 1    | 1    |
| 212195_at   | no response |         | 1 | 1    | 1.55 | 1.99  | 2.05  | 1 | 1 | 1    | 1    | 1    |
| 212196_at   | no response |         | 1 | 1    | 1.64 | 1.8   | 2.15  | 1 | 1 | 1    | 1    | 1    |
| 212200_at   | no response |         | 1 | 1    | 1    | 1.62  | 1     | 1 | 1 | 1    | 1    | 1.68 |
| 212201_at   | no response |         | 1 | 1    | 1.41 | 1.71  | 1.61  | 1 | 1 | 1    | 1    | 1    |
| 212288_at   | no response |         | 1 | 1    | 1    | 1     | 1.4   | 1 | 1 | 1    | 1.44 | 1    |
| 212845_at   | no response |         | 1 | 1    | 1.66 | 1.46  | 1     | 1 | 1 | 1    | 1    | 1    |
| 212875_s_at | no response |         | 1 | 1    | 1    | 2.06  | 1.54  | 1 | 1 | 1.63 | 1    | 1    |
| 215629_s_at | no response |         | 1 | 1    | 1    | 1     | -1.68 | 1 | 1 | 1    | 1    | 1    |
| 216449_x_at | no response |         | 1 | 1    | 1    | 1     | 1.77  | 1 | 1 | 1    | 1    | 1    |
| 216511_s_at | no response |         | 1 | 1    | 1    | -1.51 | 1     | 1 | 1 | 1    | 1    | 1    |
| 217200_x_at | no response |         | 1 | 1    | 1    | 1     | 1.46  | 1 | 1 | 1    | 1.47 | 1    |
| 217914_at   | no response |         | 1 | 1    | 1    | 1     | 1.43  | 1 | 1 | 1    | 1.54 | 1    |
| 218330_s_at | no response |         | 1 | 1    | 1    | 2.99  | 2.99  | 1 | 1 | 1    | 1    | 1    |
| 218543_s_at | no response |         | 1 | 1    | 1    | 1.59  | 1.72  | 1 | 1 | 1    | 1    | 1    |
| 219312_s_at | no response |         | 1 | 1    | 2.89 | 1     | 1     | 1 | 1 | 1    | 1    | 1    |
| 221911_at   | no response |         | 1 | 1    | 1    | -1.93 | -2.04 | 1 | 1 | 1    | 1    | 1    |
| 43511_s_at  | no response |         | 1 | 1    | 1    | 1     | 1.57  | 1 | 1 | 1    | 1.42 | 1    |
| 216272_x_at | no response | 7h3     | 1 | 1    | 1    | 1     | 1.84  | 1 | 1 | 1    | 1    | 1    |
| 44702_at    | no response | 7h3     | 1 | 1    | 1    | 1     | 1.62  | 1 | 1 | 1    | 1    | 1    |
| 203504_s_at | no response | ABCA1   | 1 | 1    | 1    | 1     | -1.47 | 1 | 1 | 1    | 1    | 1    |
| 202850_at   | no response | ABCD3   | 1 | 1    | 1    | 1     | -1.61 | 1 | 1 | 1    | 1    | 1    |
| 212895_s_at | no response | ABR     | 1 | 1    | 1    | 1.85  | 1.72  | 1 | 1 | 1    | 1    | 1    |
| 214671_s_at | no response | ABR     | 1 | 1    | 1    | 1.93  | 2.13  | 1 | 1 | 1    | 1    | 1    |
| 220287_at   | no response | ADAMTS9 | 1 | 1.69 | 1.99 | 1.79  | 1.56  | 1 | 1 | 1    | 1    | 1    |
| 203865_s_at | no response | ADARB1  | 1 | 1    | 1    | -1.62 | 1     | 1 | 1 | 1    | 1    | 1    |
| 212543_at   | no response | AIM1    | 1 | 1    | 1    | 1.41  | 1     | 1 | 1 | 1.87 | 1    | 1    |
| 207992_s_at | no response | AMPD3   | 1 | 1    | 1    | 1.47  | 1     | 1 | 1 | 1.47 | 1    | 1    |
| 215148_s_at | no response | APBA3   | 1 | 1    | 1    | 1     | 1.42  | 1 | 1 | 1    | 1    | 1    |
| 219045_at   | no response | ARHF    | 1 | 1    | 1.47 | 2.09  | 1.59  | 1 | 1 | 1    | 1    | 1    |
| 202655_at   | no response | ARMET   | 1 | 1    | 1    | 1     | 1.76  | 1 | 1 | 1    | 1    | 1    |
| 220658_s_at | no response | ARNTL2  | 1 | 1    | 1    | 1.52  | 1.7   | 1 | 1 | 1    | 1    | 1    |
| 204999_s_at | no response | ATF5    | 1 | 1    | 1    | 1     | 1.67  | 1 | 1 | 1    | 1    | 1    |
| 201242_s_at | no response | ATP1B1  | 1 | 1    | 1    | 1     | -1.67 | 1 | 1 | 1    | 1    | 1    |
| 201243_s_at | no response | ATP1B1  | 1 | 1    | 1    | 1     | -1.57 | 1 | 1 | 1    | 1    | 1    |

|             |             |          |   |      |       |       |       |      |      |   |      |      |
|-------------|-------------|----------|---|------|-------|-------|-------|------|------|---|------|------|
| 221484_at   | no response | B4GALT5  | 1 | 1    | 1.53  | 1     | 1     | 1    | 1    | 1 | 1.53 | 1.44 |
| 221485_at   | no response | B4GALT5  | 1 | 1    | 1.51  | 1.53  | 1     | 1    | 1    | 1 | 1    | 1.43 |
| 205681_at   | no response | BCL2A1   | 1 | 1    | 1     | 1     | 5.06  | 1    | 1    | 1 | 1    | 1    |
| 204908_s_at | no response | BCL3     | 1 | 1    | 3.65  | 4.71  | 6.13  | 1    | 1    | 1 | 1    | 1    |
| 209373_at   | no response | BENE     | 1 | 1    | 1     | 1     | -1.62 | 1    | 1    | 1 | 1    | 1    |
| 201169_s_at | no response | BHLHB2   | 1 | 1.8  | 1.71  | 1.68  | 1     | 1.8  | 1    | 1 | 1    | 2.04 |
| 201170_s_at | no response | BHLHB2   | 1 | 1.59 | 2.18  | 1.76  | 1.75  | 1.8  | 1    | 1 | 1    | 1    |
| 221530_s_at | no response | BHLHB3   | 1 | 1    | 2.47  | 1.91  | 1.56  | 1    | 1    | 1 | 1    | 1    |
| 211725_s_at | no response | BID      | 1 | 1    | 1     | 1.63  | 1.68  | 1    | 1    | 1 | 1    | 1    |
| 210538_s_at | no response | BIRC3    | 1 | 6.14 | 29.92 | 44.07 | 19.01 | 1    | 1    | 1 | 1    | 1    |
| 205431_s_at | no response | BMP5     | 1 | 1    | 1     | 1.69  | 1.65  | 1    | 1    | 1 | 1    | 1    |
| 217967_s_at | no response | C1orf24  | 1 | 1    | 1     | 2.01  | 2.72  | 1    | 1    | 1 | 1    | 1    |
| 220975_s_at | no response | C1QTNF1  | 1 | 1    | 1     | 1     | 1.82  | 1    | 1    | 1 | 1.68 | 1    |
| 210357_s_at | no response | C20orf16 | 1 | 1    | 2.51  | 2.64  | 2.77  | 1    | 1    | 1 | 1    | 1    |
| 218145_at   | no response | C20orf97 | 1 | 1    | 1     | 1     | 1.45  | 1    | 1    | 1 | 1    | 1    |
| 219600_s_at | no response | C21orf4  | 1 | 1    | 1     | 1     | 1.49  | 1    | 1    | 1 | 1    | 1    |
| 202241_at   | no response | C8FW     | 1 | 1    | 1.9   | 1     | 1     | 1.71 | 1.57 | 1 | 1    | 1    |
| 203963_at   | no response | CA12     | 1 | 1    | 1     | 1.67  | 1     | 1    | 1    | 1 | 1    | 1.5  |
| 215198_s_at | no response | CALD1    | 1 | 1.77 | 1     | 1     | 1     | 1    | 1    | 1 | 1    | 1    |
| 212971_at   | no response | CARS     | 1 | 1    | 1     | 1     | 1.44  | 1    | 1    | 1 | 1    | 1    |
| 211075_s_at | no response | CD47     | 1 | 1    | 1     | 1     | 1.48  | 1    | 1    | 1 | 1    | 1    |
| 211744_s_at | no response | CD58     | 1 | 1    | 1     | 1.66  | 1     | 1    | 1    | 1 | 1    | 1.41 |
| 216942_s_at | no response | CD58     | 1 | 1    | 1     | 1.49  | 1     | 1    | 1    | 1 | 1    | 1    |
| 204440_at   | no response | CD83     | 1 | 2.53 | 3.48  | 4.49  | 4.61  | 1    | 1    | 1 | 1    | 1    |
| 202910_s_at | no response | CD97     | 1 | 1    | 1     | 1     | 1.46  | 1    | 1    | 1 | 1    | 1    |
| 209286_at   | no response | CDC42EP3 | 1 | 1    | -1.55 | 1     | 1     | 1    | 1    | 1 | 1    | 1    |
| 209287_s_at | no response | CDC42EP3 | 1 | 1    | 1     | -1.41 | 1     | 1    | 1    | 1 | 1    | 1    |
| 218451_at   | no response | CDCP1    | 1 | 1    | 1     | 1     | 1.73  | 1    | 1    | 1 | 1    | 1    |
| 209112_at   | no response | CDKN1B   | 1 | 1    | -1.49 | 1     | 1     | 1    | 1    | 1 | 1    | 1    |
| 212501_at   | no response | CEBPB    | 1 | 1    | 2.09  | 2.09  | 2.64  | 1    | 1    | 1 | 1    | 1    |
| 218182_s_at | no response | CLDN1    | 1 | 1    | 3.68  | 5.25  | 6.37  | 1    | 1    | 1 | 1    | 1    |
| 210346_s_at | no response | CLK4     | 1 | 1    | 1.53  | 1     | 1     | 1    | 1    | 1 | 1    | 1    |
| 222182_s_at | no response | CNOT2    | 1 | 1    | 1     | -1.66 | 1     | 1    | 1    | 1 | 1    | 1    |
| 212091_s_at | no response | COL6A1   | 1 | 1    | 1     | 1.84  | 2.1   | 1    | 1    | 1 | 1    | 1    |

|             |             |                |      |      |       |       |       |   |      |      |      |      |
|-------------|-------------|----------------|------|------|-------|-------|-------|---|------|------|------|------|
| 213428_s_at | no response | COL6A1         | 1    | 1    | 1     | 1.48  | 1.73  | 1 | 1    | 1    | 1    | 1    |
| 209156_s_at | no response | COL6A2         | 1    | 1    | 1     | 1.44  | 2.1   | 1 | 1    | 1    | 1    | 1    |
| 208961_s_at | no response | COPEB          | 1.53 | 1.71 | 1     | 1     | 1     | 1 | 1    | 1.49 | 1    | 1    |
| 209432_s_at | no response | CREB3          | 1    | 1    | 1     | 1     | 1.88  | 1 | 1    | 1    | 1    | 1    |
| 210229_s_at | no response | CSF2           | 1    | 46.2 | 23.29 | 1     | 1     | 1 | 1    | 1    | 1    | 1    |
| 202573_at   | no response | CSNK1G2        | 1    | 1    | 1     | 1     | 1.41  | 1 | 1    | 1    | 1    | 1    |
| 221731_x_at | no response | CSPG2          | 1    | 1    | 1     | 1     | -1.65 | 1 | 1    | 1    | 1    | 1    |
| 823_at      | no response | CX3CL1         | 1    | 1    | 2.86  | 2.76  | 1     | 1 | 1    | 1    | 1.42 | 2.08 |
| 203917_at   | no response | CXADR          | 1    | 1    | 1     | 1     | -1.45 | 1 | 1    | 1    | 1    | 1    |
| 204533_at   | no response | CXCL10         | 1    | 1    | 1     | 2.07  | 2.35  | 1 | 1    | 1    | 1    | 1    |
| 209163_at   | no response | CYB561         | 1    | 1    | 1     | 1.45  | 1.81  | 1 | 1    | 1    | 1    | 1    |
| 213295_at   | no response | CYLD           | 1    | 1    | 1     | 1.81  | 1.48  | 1 | 1    | 1    | 1    | 1    |
| 205749_at   | no response | CYP1A1         | 1    | 1    | -1.93 | -2.07 | -1.95 | 1 | 1    | 1    | 1    | 1    |
| 214079_at   | no response | DHRS2          | 1    | 1    | 1     | 1     | -1.75 | 1 | 1    | 1    | 1    | 1    |
| 221245_s_at | no response | DKFZP434<br>E2 | 1    | 1    | -1.68 | 1     | 1     | 1 | 1    | 1    | 1    | 1    |
| 221538_s_at | no response | DKFZp564<br>A1 | 1    | 1    | 1     | 1.49  | 2.07  | 1 | 1    | 1    | 1    | 1    |
| 213497_at   | no response | DKFZP586<br>C1 | 1    | 1    | 2     | 2.48  | 1.84  | 1 | 1    | 1    | 1    | 1    |
| 205396_at   | no response | DKFZP586<br>N0 | 1    | 1    | 1     | 1.7   | 1.91  | 1 | 1    | 1    | 1    | 1    |
| 218284_at   | no response | DKFZP586<br>N0 | 1    | 1    | 1     | 1.6   | 1.52  | 1 | 1    | 1    | 1    | 1    |
| 54970_at    | no response | DKFZp761<br>I2 | 1    | 1    | 1     | 1     | 1.72  | 1 | 1    | 1    | 1    | 1    |
| 216870_x_at | no response | DLEU2          | 1    | 1    | 1     | 1     | -1.41 | 1 | 1    | 1    | 1    | 1    |
| 200664_s_at | no response | DNAJB1         | 1    | 1    | 1     | -1.76 | 1     | 1 | 1    | 1    | 1    | 1    |
| 200666_s_at | no response | DNAJB1         | 1    | 1    | 1     | -1.68 | 1     | 1 | 1    | 1    | 1    | 1    |
| 208499_s_at | no response | DNAJC3         | 1    | 1    | 1     | 1     | 2.47  | 1 | 1    | 1    | 1    | 1    |
| 208370_s_at | no response | DSCR1          | 1    | 1    | 1.55  | 1     | 1     | 1 | 1    | 1    | 1.54 | 1    |
| 206374_at   | no response | DUSP8          | 1    | 2.62 | 2.58  | 1     | 1     | 1 | 1    | 1.6  | 2.33 | 1    |
| 202023_at   | no response | EFNA1          | 1    | 1    | 22.17 | 1     | 1     | 1 | 1    | 1    | 1    | 1    |
| 212830_at   | no response | EGFL5          | 1    | 1    | 1     | -1.87 | -1.64 | 1 | 1    | 1    | 1    | 1    |
| 211607_x_at | no response | EGFR           | 1    | 1    | 1     | 1.96  | 1     | 1 | 1    | 1    | 1    | 1    |
| 208112_x_at | no response | EHD1           | 1    | 1    | 2.05  | 3     | 3.24  | 1 | 1.56 | 1    | 1    | 1    |
| 209037_s_at | no response | EHD1           | 1    | 1    | 2.31  | 2.93  | 2.45  | 1 | 1    | 1    | 1    | 1    |

|             |             |          |      |      |      |       |       |   |   |      |      |   |
|-------------|-------------|----------|------|------|------|-------|-------|---|---|------|------|---|
| 209038_s_at | no response | EHD1     | 1    | 1    | 2.01 | 2.08  | 2.94  | 1 | 1 | 1    | 1    | 1 |
| 209039_x_at | no response | EHD1     | 1    | 1    | 1.98 | 2.53  | 2.6   | 1 | 1 | 1    | 1    | 1 |
| 222221_x_at | no response | EHD1     | 1    | 1    | 3.12 | 4.7   | 4.12  | 1 | 1 | 1    | 1    | 1 |
| 204398_s_at | no response | EML2     | 1    | 1    | 1    | 1     | 1.48  | 1 | 1 | 1    | 1    | 1 |
| 201324_at   | no response | EMP1     | 1    | 1    | 1    | 1     | -1.4  | 1 | 1 | 1    | 1    | 1 |
| 203499_at   | no response | EPHA2    | 1    | 1.46 | 1.76 | 1     | 1     | 1 | 1 | 1    | 1    | 1 |
| 221781_s_at | no response | ERdj5    | 1    | 1    | 1    | 1     | 1.63  | 1 | 1 | 1    | 1    | 1 |
| 208658_at   | no response | ERP70    | 1    | 1    | 1    | 1     | 1.68  | 1 | 1 | 1    | 1    | 1 |
| 211048_s_at | no response | ERP70    | 1    | 1    | 1    | 1     | 1.41  | 1 | 1 | 1    | 1    | 1 |
| 202081_at   | no response | ETR101   | 1.59 | 2.16 | 1    | 1     | 1     | 1 | 1 | 1    | 1    | 1 |
| 214447_at   | no response | ETS1     | 1    | 1    | 1    | 1.56  | 1     | 1 | 1 | 1    | 1    | 1 |
| 201328_at   | no response | ETS2     | 1    | 1    | 1.6  | 2.03  | 1     | 1 | 1 | 1    | 1    | 1 |
| 203646_at   | no response | FDX1     | 1    | 1    | 1    | 1     | -1.73 | 1 | 1 | 1    | 1    | 1 |
| 200895_s_at | no response | FKBP4    | 1    | 1    | 1    | 1     | -1.43 | 1 | 1 | 1    | 1    | 1 |
| 215704_at   | no response | FLG      | 1    | 1    | 1    | -3.22 | 1     | 1 | 1 | 1    | 1    | 1 |
| 219648_at   | no response | FLJ10116 | 1    | 1    | 1    | 1.64  | 1.48  | 1 | 1 | 1    | 1    | 1 |
| 218004_at   | no response | FLJ10276 | 1    | 1    | 1.64 | 1     | 1     | 1 | 1 | 1    | 1.5  | 1 |
| 220326_s_at | no response | FLJ10357 | 1    | 1    | 1    | 1.91  | 1.76  | 1 | 1 | 1    | 1    | 1 |
| 58780_s_at  | no response | FLJ10357 | 1    | 1    | 1    | 1.93  | 1.94  | 1 | 1 | 1.41 | 1    | 1 |
| 220731_s_at | no response | FLJ10420 | 1    | 1    | 1    | 1.59  | 1.68  | 1 | 1 | 1    | 1    | 1 |
| 58308_at    | no response | FLJ10759 | 1    | 1    | 1    | -1.52 | 1     | 1 | 1 | 1    | 1    | 1 |
| 219010_at   | no response | FLJ10901 | 1    | 1    | 1    | 1     | 3.21  | 1 | 1 | 1    | 2.6  | 1 |
| 218651_s_at | no response | FLJ11196 | 1    | 1    | 1.57 | 1.58  | 1.56  | 1 | 1 | 1    | 1    | 1 |
| 218627_at   | no response | FLJ11259 | 1    | 1    | 1.93 | 3.35  | 3.35  | 1 | 1 | 1    | 1    | 1 |
| 221701_s_at | no response | FLJ12541 | 1    | 1    | 1    | 1     | 1.48  | 1 | 1 | 1    | 1    | 1 |
| 219235_s_at | no response | FLJ13171 | 1    | 1    | 1    | 1.55  | 1     | 1 | 1 | 1    | 1    | 1 |
| 218029_at   | no response | FLJ13725 | 1    | 1    | 1    | 1.62  | 1.98  | 1 | 1 | 1    | 1    | 1 |
| 45749_at    | no response | FLJ13725 | 1    | 1    | 1    | 1     | 1.44  | 1 | 1 | 1    | 1    | 1 |
| 212848_s_at | no response | FLJ14675 | 1    | 1    | 1    | 1     | -1.53 | 1 | 1 | 1    | 1    | 1 |
| 204508_s_at | no response | FLJ20151 | 1    | 1    | 1    | 1     | 1.51  | 1 | 1 | 1    | 1.73 | 1 |
| 219338_s_at | no response | FLJ20156 | 1    | 1    | 1.56 | 1.63  | 1.65  | 1 | 1 | 1    | 1    | 1 |
| 218035_s_at | no response | FLJ20273 | 1    | 1    | 1.78 | 2.1   | 1.49  | 1 | 1 | 1    | 1    | 1 |
| 219315_s_at | no response | FLJ20898 | 1    | 1    | 1    | 1     | 1.71  | 1 | 1 | 1    | 1    | 1 |
| 218144_s_at | no response | FLJ22056 | 1    | 1    | 1    | 1     | 1.54  | 1 | 1 | 1    | 1    | 1 |
| 219202_at   | no response | FLJ22341 | 1    | 1    | 1    | 1.61  | 1.92  | 1 | 1 | 1    | 1    | 1 |
| 220169_at   | no response | FLJ23235 | 1    | 1    | 1    | 1.79  | 1     | 1 | 1 | 1    | 1    | 1 |

|             |             |          |   |       |       |       |       |      |   |      |      |      |
|-------------|-------------|----------|---|-------|-------|-------|-------|------|---|------|------|------|
| 219973_at   | no response | FLJ23548 | 1 | 1     | 1     | 1     | -1.83 | 1    | 1 | 1    | 1    | 1    |
| 36564_at    | no response | FLJ90005 | 1 | 1     | 1     | 1     | 1.52  | 1    | 1 | 1    | 1    | 1    |
| 210142_x_at | no response | FLOT1    | 1 | 1     | 1     | 1     | -1.43 | 1    | 1 | 1    | 1    | 1    |
| 205935_at   | no response | FOXF1    | 1 | 1     | -1.45 | 1     | 1     | 1    | 1 | 1    | 1    | 1    |
| 205565_s_at | no response | FRDA     | 1 | 1     | 1     | 1.51  | 1.65  | 1    | 1 | 1    | 1    | 1    |
| 203592_s_at | no response | FSTL3    | 1 | 1     | 1.81  | 2.08  | 1     | 1    | 1 | 1    | 1    | 1.46 |
| 213524_s_at | no response | GOS2     | 1 | 1     | 6.72  | 9.97  | 6.38  | 1    | 1 | 1    | 1    | 1    |
| 203725_at   | no response | GADD45A  | 1 | 1.73  | 1.85  | 1     | 1     | 1.61 | 1 | 1.62 | 1.72 | 1    |
| 209710_at   | no response | GATA2    | 1 | 1     | -1.83 | 1     | 1     | 1    | 1 | 1    | 1    | 1    |
| 210002_at   | no response | GATA6    | 1 | 1     | 1.9   | 1     | 1     | 1    | 1 | 1    | 1.5  | 1    |
| 218834_s_at | no response | GBP      | 1 | 1     | 1     | 1     | 2.43  | 1    | 1 | 1    | 1.7  | 1    |
| 202269_x_at | no response | GBP1     | 1 | 1     | 1     | 7.21  | 1     | 1    | 1 | 1    | 1    | 1    |
| 202748_at   | no response | GBP2     | 1 | 1     | 1     | 1.7   | 1     | 1    | 1 | 1    | 1    | 1.42 |
| 204224_s_at | no response | GCH1     | 1 | 1     | 1.85  | 2.03  | 1.81  | 1    | 1 | 1    | 1    | 1    |
| 204867_at   | no response | GCHFR    | 1 | 1     | 1     | 1     | -1.78 | 1    | 1 | 1    | 1    | 1    |
| 204472_at   | no response | GEM      | 1 | 1.63  | 1.61  | 1     | 1     | 1    | 1 | 1    | 1    | 1    |
| 205100_at   | no response | GFPT2    | 1 | 1     | 2.15  | 3.56  | 3.84  | 1    | 1 | 1    | 1    | 1    |
| 208296_x_at | no response | GG2-1    | 1 | 1     | 2.3   | 2.67  | 1.93  | 1    | 1 | 1    | 1    | 1    |
| 210260_s_at | no response | GG2-1    | 1 | 1     | 2.21  | 2.61  | 2.99  | 1    | 1 | 1    | 1    | 1    |
| 209576_at   | no response | GNAI1    | 1 | 1     | 1     | -1.61 | -1.66 | 1    | 1 | 1    | 1    | 1    |
| 210473_s_at | no response | GPR125   | 1 | 1     | 1     | 1     | 1.42  | 1    | 1 | 1    | 1    | 1    |
| 203632_s_at | no response | GPRC5B   | 1 | 1     | 1     | 3.81  | 4.25  | 1    | 1 | 1    | 1    | 1    |
| 219327_s_at | no response | GPRC5C   | 1 | 1     | 1     | -1.87 | -2.39 | 1    | 1 | 1    | 1    | 1    |
| 204396_s_at | no response | GPRK5    | 1 | 1     | 1     | 1.64  | 1     | 1    | 1 | 1    | 1.48 | 1    |
| 212090_at   | no response | GRINA    | 1 | 1     | 1     | 1.62  | 2.24  | 1    | 1 | 1    | 1    | 1    |
| 221667_s_at | no response | H11      | 1 | 1     | 1     | 1     | -1.89 | 1    | 1 | 1.44 | 1.45 | 1    |
| 203394_s_at | no response | HES1     | 1 | -1.48 | -1.6  | 1     | 1     | 1    | 1 | 1    | 1    | 1    |
| 218839_at   | no response | HEY1     | 1 | 1     | 1     | 1     | -1.43 | 1    | 1 | 1    | 1    | 1    |
| 212642_s_at | no response | HIVEP2   | 1 | 1     | 2.28  | 2.31  | 1.82  | 1    | 1 | 1    | 1    | 1    |
| 213932_x_at | no response | HLA-A    | 1 | 1     | 1     | 1.51  | 1.87  | 1    | 1 | 1    | 1    | 1    |
| 215313_x_at | no response | HLA-A    | 1 | 1     | 1     | 1.52  | 1.66  | 1    | 1 | 1    | 1    | 1    |
| 208729_x_at | no response | HLA-B    | 1 | 1     | 1     | 1.54  | 1.88  | 1    | 1 | 1    | 1    | 1    |
| 209140_x_at | no response | HLA-B    | 1 | 1     | 1     | 1.68  | 2.03  | 1    | 1 | 1    | 1    | 1    |
| 211911_x_at | no response | HLA-B    | 1 | 1     | 1     | 1.49  | 1.44  | 1    | 1 | 1    | 1    | 1    |
| 216526_x_at | no response | HLA-C    | 1 | 1     | 1     | 1.54  | 1.64  | 1    | 1 | 1    | 1    | 1    |
| 211529_x_at | no response | HLA-G    | 1 | 1     | 1     | 1.5   | 1.89  | 1    | 1 | 1    | 1    | 1    |

|             |             |          |       |       |       |       |       |   |      |      |      |      |
|-------------|-------------|----------|-------|-------|-------|-------|-------|---|------|------|------|------|
| 211530_x_at | no response | HLA-G    | 1     | 1     | 1     | 1     | 1.75  | 1 | 1    | 1    | 1    | 1    |
| 212115_at   | no response | HN1L     | 1     | 1     | 1     | 1     | 1.51  | 1 | 1    | 1    | 1    | 1    |
| 204818_at   | no response | HSD17B2  | 1     | 1     | 1     | -1.4  | -2.24 | 1 | 1    | 1    | 1    | 1    |
| 200799_at   | no response | HSPA1A   | 1     | 1     | 1     | -2.01 | -1.7  | 1 | 1    | 1    | 1    | 1    |
| 200800_s_at | no response | HSPA1B   | 1     | 1     | 1     | -1.68 | -1.74 | 1 | 1    | 1    | 1    | 1    |
| 202581_at   | no response | HSPA1B   | 1     | 1     | 1     | -1.56 | -1.67 | 1 | 1    | 1    | 1    | 1    |
| 211936_at   | no response | HSPA5    | 1     | 1     | 1     | 1     | 1.94  | 1 | 1    | 1    | 1    | 1    |
| 202602_s_at | no response | HTATSF1  | 1     | 1     | 1     | 1     | -1.6  | 1 | 1    | 1    | 1    | 1    |
| 200825_s_at | no response | HYOU1    | 1     | 1     | 1     | 1     | 1.71  | 1 | 1    | 1    | 1    | 1    |
| 202637_s_at | no response | ICAM1    | 1     | 1     | 7.94  | 15.58 | 8.69  | 1 | 1    | 1    | 1    | 1    |
| 202638_s_at | no response | ICAM1    | 1     | 4.74  | 18.28 | 30.07 | 18.6  | 1 | 1    | 1    | 1    | 1    |
| 215485_s_at | no response | ICAM1    | 1     | 1     | 3.45  | 3.58  | 4.24  | 1 | 1    | 1    | 1    | 1    |
| 213931_at   | no response | ID2      | -2.29 | -1.95 | 1     | 1     | 1     | 1 | 1    | 1    | 1    | 1    |
| 218611_at   | no response | IER5     | 1     | 2.66  | 2.58  | 1.59  | 1.7   | 1 | 1    | 1    | 1    | 1    |
| 204786_s_at | no response | IFNAR2   | 1     | 1     | 5.81  | 2.7   | 1     | 1 | 1    | 1    | 1    | 1    |
| 202727_s_at | no response | IFNGR1   | 1     | 1     | 1.59  | 1.71  | 1     | 1 | 1    | 1    | 1    | 1.41 |
| 211676_s_at | no response | IFNGR1   | 1     | 1     | 1     | 1.63  | 1.43  | 1 | 1    | 1.45 | 1    | 1    |
| 204549_at   | no response | IKBKE    | 1     | 1     | 1     | 1.61  | 2.22  | 1 | 1    | 1.49 | 1    | 1    |
| 205376_at   | no response | INPP4B   | 1     | 1     | 1     | 1     | -1.64 | 1 | 1    | 1    | 1    | 1    |
| 202531_at   | no response | IRF1     | 1     | 2.47  | 2.54  | 2.05  | 1.94  | 1 | 1    | 1    | 1    | 1    |
| 203275_at   | no response | IRF2     | 1     | 1     | 1     | 1.83  | 1.84  | 1 | 1    | 2.3  | 1    | 1    |
| 205032_at   | no response | ITGA2    | 1     | 1     | 1     | 1     | 1.83  | 1 | 1    | 1    | 1    | 1    |
| 201363_s_at | no response | IVNS1ABP | 1     | -1.45 | -1.43 | 1     | 1     | 1 | 1    | 1    | 1    | 1    |
| 201464_x_at | no response | JUN      | 3.97  | 5.55  | 1.66  | 1     | 1     | 1 | 1    | 1.55 | 1    | 1    |
| 213281_at   | no response | JUN      | 1.97  | 2.62  | 1.41  | 1     | 1     | 1 | 1    | 1    | 1    | 1    |
| 203752_s_at | no response | JUND     | 1     | 1     | 1.65  | 1     | 1     | 1 | 1.49 | 1    | 1.56 | 1    |
| 203402_at   | no response | KCNAB2   | 1     | 1     | 1     | 1     | 1.45  | 1 | 1    | 1    | 1    | 1    |
| 212704_at   | no response | KIAA0191 | 1     | 1     | 1     | 1     | -1.47 | 1 | 1    | 1    | 1    | 1    |
| 213107_at   | no response | KIAA0551 | 1     | 1     | 1     | 1     | -1.51 | 1 | 1    | 1    | 1    | 1    |
| 205730_s_at | no response | KIAA0843 | 1     | 1     | 1     | 1     | 2.09  | 1 | 1    | 1    | 1    | 1    |
| 215760_s_at | no response | KIAA0963 | 1     | 1     | 1     | 1.58  | 2.14  | 1 | 1    | 1    | 1    | 1    |
| 212838_at   | no response | KIAA1010 | 1     | 1     | -1.44 | 1     | 1     | 1 | 1    | 1    | 1    | 1    |
| 222157_s_at | no response | KIAA1449 | 1     | 1     | 1     | 1     | 1.47  | 1 | 1    | 1    | 1    | 1    |
| 201648_at   | no response | KIAA1579 | 1     | 1     | 1     | 1.69  | 1.69  | 1 | 1    | 1    | 1    | 1    |
| 204334_at   | no response | KLF7     | 1     | 1     | 2.56  | 1.89  | 1.64  | 1 | 1.44 | 1    | 1    | 1    |
| 202267_at   | no response | LAMC2    | 1     | 1     | 1.77  | 3.79  | 5.31  | 1 | 1    | 1    | 1    | 1    |



|             |             |              |   |      |      |       |       |   |   |      |      |      |
|-------------|-------------|--------------|---|------|------|-------|-------|---|---|------|------|------|
| 207517_at   | no response | LAMC2        | 1 | 2.92 | 3.26 | 3.22  | 3.57  | 1 | 1 | 1    | 1    | 1    |
| 211005_at   | no response | LAT          | 1 | 1    | 1    | 1.43  | 1.73  | 1 | 1 | 1    | 1    | 1    |
| 203002_at   | no response | LCCP         | 1 | 1    | 1.6  | 1     | 1     | 1 | 1 | 1    | 1    | 1    |
| 217173_s_at | no response | LDLR         | 1 | 1.99 | 1.56 | 1     | 1     | 1 | 1 | 1    | 1.43 | 1    |
| 212412_at   | no response | LIM          | 1 | 1    | 1    | 1     | -1.53 | 1 | 1 | 1    | 1    | 1    |
| 213142_x_at | no response | LOC5410<br>3 | 1 | 1    | 1    | 1.62  | 2.25  | 1 | 1 | 1.41 | 1    | 1    |
| 222150_s_at | no response | LOC5410<br>3 | 1 | 1    | 1    | 1.57  | 1.97  | 1 | 1 | 1    | 1.45 | 1    |
| 219596_at   | no response | LOC5690<br>6 | 1 | 1    | 1    | -1.62 | -1.6  | 1 | 1 | 1    | 1    | 1    |
| 202998_s_at | no response | LOXL2        | 1 | 1    | 1    | 1.57  | 1.54  | 1 | 1 | 1    | 1    | 1    |
| 216250_s_at | no response | LPXN         | 1 | 1    | 1    | 1     | 1.64  | 1 | 1 | 1    | 1    | 1    |
| 211596_s_at | no response | LRIG1        | 1 | 1    | 1    | 1     | 1.53  | 1 | 1 | 1    | 1.57 | 1    |
| 207339_s_at | no response | LTB          | 1 | 1    | 3.74 | 8.08  | 9.69  | 1 | 1 | 1    | 1.78 | 1.64 |
| 210993_s_at | no response | MADH1        | 1 | 1    | 1.84 | 1.94  | 1.56  | 1 | 1 | 1    | 1    | 1    |
| 205397_x_at | no response | MADH3        | 1 | 1    | 1    | 2.08  | 1     | 1 | 1 | 1    | 1    | 1    |
| 202670_at   | no response | MAP2K1       | 1 | 1    | 1    | 1     | 1.57  | 1 | 1 | 1    | 1    | 1    |
| 207667_s_at | no response | MAP2K3       | 1 | 1    | 1    | 1.59  | 1     | 1 | 1 | 1.5  | 1    | 1.48 |
| 215498_s_at | no response | MAP2K3       | 1 | 1    | 1.46 | 1.81  | 1.56  | 1 | 1 | 1    | 1    | 1    |
| 215499_at   | no response | MAP2K3       | 1 | 1    | 1.44 | 1.52  | 1     | 1 | 1 | 1    | 1    | 1.4  |
| 203514_at   | no response | MAP3K3       | 1 | 1    | 1    | 2.22  | 1     | 1 | 1 | 1    | 1    | 1    |
| 205375_at   | no response | MDF1         | 1 | 1    | 1    | 1     | -1.75 | 1 | 1 | 1    | 1    | 1    |
| 209199_s_at | no response | MEF2C        | 1 | 1    | 1    | -1.46 | -1.48 | 1 | 1 | 1    | 1    | 1    |
| 207480_s_at | no response | MEIS2        | 1 | 1    | 1    | 1     | -1.43 | 1 | 1 | 1    | 1    | 1    |
| 220189_s_at | no response | MGAT4B       | 1 | 1    | 1    | 1     | 1.65  | 1 | 1 | 1    | 1    | 1    |
| 218600_at   | no response | MGC1098<br>6 | 1 | 1    | 1    | 1.66  | 2.07  | 1 | 1 | 1    | 1    | 1    |
| 218358_at   | no response | MGC1125<br>6 | 1 | 1    | 1    | 1     | 1.42  | 1 | 1 | 1    | 1    | 1    |
| 221912_s_at | no response | MGC1203      | 1 | 1    | 1    | 1.66  | 2.31  | 1 | 1 | 1    | 1    | 1.42 |
| 218260_at   | no response | MGC2594      | 1 | 1    | 1    | 1     | 1.52  | 1 | 1 | 1    | 1    | 1    |
| 217992_s_at | no response | MGC4342      | 1 | 1    | 1.42 | 1.84  | 2.17  | 1 | 1 | 1    | 1    | 1    |
| 209372_x_at | no response | MGC8685      | 1 | 1    | 1    | 1.42  | 1     | 1 | 1 | 1.4  | 1    | 1.79 |
| 203637_s_at | no response | MID1         | 1 | 1    | 1    | 1     | -1.54 | 1 | 1 | 1    | 1    | 1    |
| 203414_at   | no response | MMD          | 1 | 1    | 1    | 2.05  | 1.67  | 1 | 1 | 1    | 1    | 1    |

|             |             |               |      |       |       |       |       |   |      |      |      |      |
|-------------|-------------|---------------|------|-------|-------|-------|-------|---|------|------|------|------|
| 204475_at   | no response | MMP1          | 1    | 1     | 1     | 1     | 4.36  | 1 | 1    | 1    | 1    | 1    |
| 201069_at   | no response | MMP2          | 1    | 1     | 1     | 1     | -1.45 | 1 | 1    | 1    | 1    | 1    |
| 203936_s_at | no response | MMP9          | 1    | 1     | 1     | 1     | 1.42  | 1 | 1    | 1    | 1    | 1    |
| 212885_at   | no response | MPHOSP<br>H10 | 1    | 1.51  | 1     | 1     | 1     | 1 | 1    | 1    | 1    | 1    |
| 212614_at   | no response | MRF2          | 1    | 1     | 1     | -1.48 | -1.67 | 1 | 1    | 1    | 1    | 1    |
| 218978_s_at | no response | MSCP          | 1    | 1     | 1     | 1.78  | 1     | 1 | 1    | 2.19 | 1    | 1.61 |
| 221920_s_at | no response | MSCP          | 1    | 1     | 1.53  | 1.69  | 1.45  | 1 | 1    | 1    | 1    | 1    |
| 212096_s_at | no response | MTSG1         | 1    | 1     | 1     | -1.81 | -1.7  | 1 | 1    | 1    | 1    | 1    |
| 203027_s_at | no response | MVD           | 1    | 1     | 1     | 1     | 3.49  | 1 | 1    | 1    | 1    | 1    |
| 213906_at   | no response | MYBL1         | 1    | 1     | 1.88  | 1.82  | 1     | 1 | 1    | 1    | 1    | 1    |
| 211926_s_at | no response | MYH9          | 1    | 1     | 1     | 1     | 1.57  | 1 | 1    | 1    | 1.42 | 1    |
| 32811_at    | no response | MYO1C         | 1    | 1     | 1     | 1.69  | 1     | 1 | 1    | 1    | 1    | 1    |
| 214775_at   | no response | N4BP3         | 1    | 1     | 1.92  | 2     | 1.96  | 1 | 1.84 | 1    | 1    | 1    |
| 209272_at   | no response | NAB1          | 1    | 1     | 1.79  | 1.62  | 1     | 1 | 1    | 1    | 1    | 1    |
| 211139_s_at | no response | NAB1          | 1    | 1     | 1.54  | 1     | 1     | 1 | 1    | 1    | 1    | 1    |
| 202905_x_at | no response | NBS1          | 1    | 1     | 1     | 1.52  | 1.45  | 1 | 1    | 1    | 1    | 1    |
| 202906_s_at | no response | NBS1          | 1    | 1     | 1     | 1.55  | 1.65  | 1 | 1    | 1    | 1    | 1    |
| 217299_s_at | no response | NBS1          | 1    | 1     | 1     | 1.65  | 1.56  | 1 | 1    | 1    | 1    | 1    |
| 201830_s_at | no response | NET1          | 1    | 1     | 1     | 1.51  | 1     | 1 | 1    | 1    | 1    | 1    |
| 218888_s_at | no response | NETO2         | 1    | 1     | 1     | -1.61 | -1.71 | 1 | 1    | 1    | 1    | 1    |
| 200758_s_at | no response | NFE2L1        | 1    | 1     | 1     | 1     | 1.41  | 1 | 1    | 1    | 1    | 1    |
| 204702_s_at | no response | NFE2L3        | 1    | 1     | 1     | 1.88  | 2.38  | 1 | 1    | 1.41 | 1    | 1    |
| 209239_at   | no response | NFKB1         | 1    | 1     | 2.1   | 2.83  | 1.99  | 1 | 1    | 1    | 1    | 1    |
| 209636_at   | no response | NFKB2         | 1    | 1     | 5.84  | 9.34  | 13.06 | 1 | 1    | 1    | 1    | 1    |
| 201502_s_at | no response | NFKBIA        | 5.65 | 13.26 | 14.08 | 10.91 | 9.13  | 1 | 1    | 1    | 1    | 1    |
| 203304_at   | no response | NMA           | 1    | 1     | 1.46  | 1     | 1     | 1 | 1    | 1    | 1    | 1    |
| 203964_at   | no response | NMI           | 1    | 1     | 1     | 1.78  | 2.08  | 1 | 1    | 1    | 1    | 1    |
| 204791_at   | no response | NR2C1         | 1    | 1     | 1     | 1     | -1.45 | 1 | 1    | 1    | 1    | 1    |
| 209505_at   | no response | NR2F1         | 1    | 1     | -1.5  | -2.12 | -1.79 | 1 | 1    | 1    | 1    | 1    |
| 209120_at   | no response | NR2F2         | 1    | 1     | 1     | -1.7  | -1.74 | 1 | 1    | 1    | 1    | 1    |
| 215073_s_at | no response | NR2F2         | 1    | 1     | -1.54 | 1     | -1.68 | 1 | 1    | 1    | 1    | 1    |
| 214632_at   | no response | NRP2          | 1    | 1     | 1     | 2.02  | 2.11  | 1 | 1    | 1    | 1    | 1    |
| 207740_s_at | no response | NUP62         | 1    | 1     | 1     | 2.2   | 1.55  | 1 | 1    | 1    | 1    | 1    |
| 219489_s_at | no response | NXN           | 1    | 1     | 1     | 1     | -1.56 | 1 | 1    | 1    | 1    | 1    |
| 210443_x_at | no response | OGFR          | 1    | 1     | 1     | 1     | 1.44  | 1 | 1    | 1    | 1.44 | 1    |

|             |             |            |   |      |      |       |       |   |   |   |     |      |
|-------------|-------------|------------|---|------|------|-------|-------|---|---|---|-----|------|
| 202073_at   | no response | OPTN       | 1 | 1    | 1    | 2.35  | 2.24  | 1 | 1 | 1 | 1   | 1    |
| 202074_s_at | no response | OPTN       | 1 | 1    | 1.58 | 2.65  | 3.87  | 1 | 1 | 1 | 1   | 1    |
| 213568_at   | no response | OSR2       | 1 | 1    | 1    | 1     | -1.76 | 1 | 1 | 1 | 1   | 1    |
| 206825_at   | no response | OXTR       | 1 | 1    | 2.04 | 2.22  | 1.92  | 1 | 1 | 1 | 1   | 1.45 |
| 202733_at   | no response | P4HA2      | 1 | 1    | 1    | 1     | 1.66  | 1 | 1 | 1 | 1   | 1    |
| 204715_at   | no response | PANX1      | 1 | 1    | 1.61 | 1.92  | 1.75  | 1 | 1 | 1 | 1   | 1    |
| 204735_at   | no response | PDE4A      | 1 | 1    | 1    | 1     | 1.41  | 1 | 1 | 1 | 1   | 1    |
| 203097_s_at | no response | PDZGEF1    | 1 | 1    | 1    | 1     | -1.41 | 1 | 1 | 1 | 1   | 1    |
| 212094_at   | no response | PEG10      | 1 | 1    | 1    | 1     | -1.47 | 1 | 1 | 1 | 1   | 1    |
| 218319_at   | no response | PELI1      | 1 | 1    | 2.41 | 2.24  | 2.18  | 1 | 1 | 1 | 1   | 1    |
| 220952_s_at | no response | PEPP2      | 1 | 1    | 1    | -1.44 | -1.48 | 1 | 1 | 1 | 1   | 1    |
| 221816_s_at | no response | PHF11      | 1 | 1    | 1    | 1     | 1.7   | 1 | 1 | 1 | 1   | 1    |
| 209803_s_at | no response | PHLDA2     | 1 | 1    | 1    | 1.42  | 1     | 1 | 1 | 1 | 1   | 1    |
| 203879_at   | no response | PIK3CD     | 1 | 1    | 1.79 | 2.2   | 2.35  | 1 | 1 | 1 | 1   | 1    |
| 211668_s_at | no response | PLAU       | 1 | 3.22 | 3.81 | 2.87  | 2.2   | 1 | 1 | 1 | 1   | 1    |
| 210845_s_at | no response | PLAUR      | 1 | 1    | 1    | 1     | 1.54  | 1 | 1 | 1 | 1   | 1    |
| 203895_at   | no response | PLCB4      | 1 | 1    | 1    | 1.57  | 2.01  | 1 | 1 | 1 | 1   | 1    |
| 203896_s_at | no response | PLCB4      | 1 | 1    | 1    | 1     | 2.11  | 1 | 1 | 1 | 1   | 1.5  |
| 217841_s_at | no response | PME-1      | 1 | 1    | 1    | 1     | -1.42 | 1 | 1 | 1 | 1   | 1    |
| 212230_at   | no response | PPAP2B     | 1 | 1    | 1    | 2.17  | 1.85  | 1 | 1 | 1 | 1   | 1    |
| 208510_s_at | no response | PPARG      | 1 | 1    | 1    | -1.57 | -1.65 | 1 | 1 | 1 | 1   | 1    |
| 201490_s_at | no response | PPIF       | 1 | 1    | 1    | 1.74  | 1.8   | 1 | 1 | 1 | 1   | 1    |
| 201859_at   | no response | PRG1       | 1 | 1    | 1    | 3.14  | 2.82  | 1 | 1 | 1 | 1   | 1    |
| 202545_at   | no response | PRKCD      | 1 | 1    | 1    | 1     | 1.6   | 1 | 1 | 1 | 1   | 1    |
| 207401_at   | no response | PROX1      | 1 | 1    | 2.81 | 1     | 1     | 1 | 1 | 1 | 2.2 | 2.06 |
| 203089_s_at | no response | PRSS25     | 1 | 1    | 1    | 1     | 1.5   | 1 | 1 | 1 | 1   | 1    |
| 204279_at   | no response | PSMB9      | 1 | 1    | 1    | 1.66  | 2.1   | 1 | 1 | 1 | 1   | 1    |
| 207388_s_at | no response | PTGES      | 1 | 1    | 1    | 1.51  | 1     | 1 | 1 | 1 | 1   | 1.46 |
| 210367_s_at | no response | PTGES      | 1 | 1    | 1.46 | 1.59  | 1.6   | 1 | 1 | 1 | 1   | 1    |
| 222167_at   | no response | PVRL3      | 1 | 1    | 1    | 1     | -1.43 | 1 | 1 | 1 | 1   | 1    |
| 203883_s_at | no response | Rab11-FIP2 | 1 | 1    | 1    | 1     | -1.44 | 1 | 1 | 1 | 1   | 1    |
| 202252_at   | no response | RAB13      | 1 | 1    | 1    | 1     | 1.64  | 1 | 1 | 1 | 1   | 1    |
| 212561_at   | no response | RAB6IP1    | 1 | 1    | 1.4  | 1.43  | 1.58  | 1 | 1 | 1 | 1   | 1    |
| 207419_s_at | no response | RAC2       | 1 | 1    | 1    | 1     | 2.6   | 1 | 1 | 1 | 1   | 1    |
| 213603_s_at | no response | RAC2       | 1 | 1    | 1    | 1.7   | 2.69  | 1 | 1 | 1 | 1   | 1    |

|             |             |          |   |       |       |       |       |   |   |      |   |      |
|-------------|-------------|----------|---|-------|-------|-------|-------|---|---|------|---|------|
| 202052_s_at | no response | RAI14    | 1 | 1     | 1     | 1.87  | 1.98  | 1 | 1 | 1    | 1 | 1    |
| 203108_at   | no response | RAI3     | 1 | 1     | 1     | 1     | -1.7  | 1 | 1 | 1    | 1 | 1    |
| 205205_at   | no response | RELB     | 1 | 1     | 4.78  | 7.76  | 7.5   | 1 | 1 | 1    | 1 | 1    |
| 202963_at   | no response | RFX5     | 1 | 1     | 1     | 1.68  | 1.76  | 1 | 1 | 1.48 | 1 | 1    |
| 203823_at   | no response | RGS3     | 1 | 1     | 1.78  | 1     | 1     | 1 | 1 | 1    | 1 | 1    |
| 202975_s_at | no response | RHOBTB3  | 1 | 1     | 1     | 1     | -1.45 | 1 | 1 | 1    | 1 | 1    |
| 211564_s_at | no response | RIL      | 1 | 1     | 1     | 2.54  | 3.08  | 1 | 1 | 1    | 1 | 1    |
| 209545_s_at | no response | RIPK2    | 1 | 1     | 1.86  | 1.7   | 1     | 1 | 1 | 1    | 1 | 1.7  |
| 213338_at   | no response | RIS1     | 1 | 1     | 1     | 1     | 1.44  | 1 | 1 | 1    | 1 | 1    |
| 213194_at   | no response | ROBO1    | 1 | 1     | 1     | 1.6   | 1.72  | 1 | 1 | 1    | 1 | 1    |
| 214697_s_at | no response | ROD1     | 1 | 1     | 1     | 1.55  | 1     | 1 | 1 | 1    | 1 | 1    |
| 215495_s_at | no response | SAMD4    | 1 | 1     | 1     | 1.8   | 1     | 1 | 1 | 1    | 1 | 1    |
| 218854_at   | no response | SART2    | 1 | 1     | 1     | 2.01  | 2.54  | 1 | 1 | 1    | 1 | 1    |
| 202071_at   | no response | SDC4     | 1 | 2.2   | 2.97  | 4.4   | 2.97  | 1 | 1 | 1    | 1 | 1    |
| 202061_s_at | no response | SEL1L    | 1 | 1     | 1     | 1     | 1.75  | 1 | 1 | 1    | 1 | 1    |
| 202062_s_at | no response | SEL1L    | 1 | 1     | 1     | 1     | 2.03  | 1 | 1 | 1    | 1 | 1    |
| 202064_s_at | no response | SEL1L    | 1 | 1     | 1     | 1     | 1.81  | 1 | 1 | 1    | 1 | 1    |
| 201739_at   | no response | SGK      | 1 | -1.42 | -2.27 | -2.58 | -2.64 | 1 | 1 | 1    | 1 | 1    |
| 222258_s_at | no response | SH3BP4   | 1 | 1     | -1.62 | -1.87 | 1     | 1 | 1 | 1    | 1 | 1    |
| 204657_s_at | no response | SHB      | 1 | 1     | 1     | 1.5   | 1     | 1 | 1 | 1    | 1 | 1.43 |
| 219229_at   | no response | SLC21A11 | 1 | 1     | 1     | 1.94  | 1.61  | 1 | 1 | 1    | 1 | 1    |
| 219911_s_at | no response | SLC21A12 | 1 | 1     | 1     | 1     | 1.58  | 1 | 1 | 1    | 1 | 1    |
| 205896_at   | no response | SLC22A4  | 1 | 1     | 1     | 1     | 1.69  | 1 | 1 | 1    | 1 | 1    |
| 218725_at   | no response | SLC25A22 | 1 | 1     | 1     | 1     | 1.48  | 1 | 1 | 1    | 1 | 1    |
| 220091_at   | no response | SLC2A6   | 1 | 1     | 6.78  | 5.73  | 5.34  | 1 | 1 | 1    | 1 | 1    |
| 212907_at   | no response | SLC30A1  | 1 | 1     | -1.44 | 1     | 1     | 1 | 1 | 1    | 1 | 1    |
| 215811_at   | no response | SNCA     | 1 | -1.76 | 1     | 1     | 1     | 1 | 1 | 1    | 1 | 1    |
| 215223_s_at | no response | SOD2     | 1 | 1     | 1     | 2.51  | 2.86  | 1 | 1 | 1    | 1 | 1    |
| 216841_s_at | no response | SOD2     | 1 | 1     | 1     | 3.08  | 3.2   | 1 | 1 | 1    | 1 | 1    |
| 221477_s_at | no response | SOD2     | 1 | 1     | 1.78  | 3.04  | 2.94  | 1 | 1 | 1    | 1 | 1    |
| 213668_s_at | no response | SOX4     | 1 | 1     | 1.79  | 1     | 1     | 1 | 1 | 1    | 1 | 1    |
| 202935_s_at | no response | SOX9     | 1 | 1     | 1.63  | 1     | 1     | 1 | 1 | 1    | 1 | 1    |
| 202936_s_at | no response | SOX9     | 1 | 1     | 1.46  | 1     | 1     | 1 | 1 | 1    | 1 | 1    |
| 202864_s_at | no response | SP100    | 1 | 1     | 1     | 1     | 1.58  | 1 | 1 | 1    | 1 | 1    |
| 202458_at   | no response | SPUVE    | 1 | 1     | 1     | 1     | 1.44  | 1 | 1 | 1    | 1 | 1    |
| 38766_at    | no response | SRCAP    | 1 | 1     | 1     | 1.59  | 2.05  | 1 | 1 | 1    | 1 | 1    |

|             |             |               |   |      |      |      |       |   |   |      |      |      |
|-------------|-------------|---------------|---|------|------|------|-------|---|---|------|------|------|
| 202200_s_at | no response | SRPK1         | 1 | 1    | 1    | 1.41 | 1.45  | 1 | 1 | 1    | 1    | 1    |
| 204804_at   | no response | SSA1          | 1 | 1    | 1    | 1.82 | 1     | 1 | 1 | 1    | 1    | 1    |
| 203787_at   | no response | SSBP2         | 1 | 1    | 1    | 1    | -1.85 | 1 | 1 | 1    | 1    | 1.41 |
| 217455_s_at | no response | SSTR2         | 1 | 1    | 1    | 2.37 | 1     | 1 | 1 | 1    | 1    | 1    |
| 205542_at   | no response | STEAP         | 1 | 1    | 1    | 1    | 2.28  | 1 | 1 | 1    | 1    | 1    |
| 203047_at   | no response | STK10         | 1 | 1    | 1    | 1    | 1.55  | 1 | 1 | 1    | 1    | 1    |
| 201079_at   | no response | SYNGR2        | 1 | 1    | 1    | 1    | 1.83  | 1 | 1 | 1    | 1    | 1    |
| 207616_s_at | no response | TANK          | 1 | 1    | 1.5  | 1.7  | 1.56  | 1 | 1 | 1    | 1    | 1    |
| 206649_s_at | no response | TFE3          | 1 | 1    | 1    | 1    | 1.71  | 1 | 1 | 1    | 1    | 1    |
| 202509_s_at | no response | TNFAIP2       | 1 | 1    | 4    | 6.65 | 1     | 1 | 1 | 1    | 1    | 1    |
| 202510_s_at | no response | TNFAIP2       | 1 | 2.46 | 5.36 | 7.86 | 4.45  | 1 | 1 | 1    | 1    | 1    |
| 209294_x_at | no response | TNFRSF10<br>B | 1 | 1    | 2.01 | 2.27 | 1.9   | 1 | 1 | 1    | 1    | 1    |
| 210405_x_at | no response | TNFRSF10<br>B | 1 | 1    | 1.9  | 2.22 | 1.99  | 1 | 1 | 1    | 1    | 1    |
| 203508_at   | no response | TNFRSF1B      | 1 | 1    | 1    | 1.54 | 1     | 1 | 1 | 1    | 1    | 1.45 |
| 218856_at   | no response | TNFRSF21      | 1 | 1    | 1    | -1.8 | -1.53 | 1 | 1 | 1    | 1    | 1    |
| 206467_x_at | no response | TNFRSF6B      | 1 | 1    | 1    | 1    | 1.75  | 1 | 1 | 1    | 1    | 1    |
| 207536_s_at | no response | TNFRSF9       | 1 | 1    | 3.1  | 3.94 | 5.23  | 1 | 1 | 1    | 1.51 | 1.58 |
| 206508_at   | no response | TNFSF7        | 1 | 1    | 1    | 2.3  | 3.05  | 1 | 1 | 1    | 1    | 1    |
| 207196_s_at | no response | TNIP1         | 1 | 1    | 2.77 | 6.64 | 7.37  | 1 | 1 | 1    | 1    | 1    |
| 48531_at    | no response | TNIP2         | 1 | 1    | 1.5  | 1    | 1     | 1 | 1 | 1    | 1    | 1.53 |
| 204529_s_at | no response | TOX           | 1 | 1    | 1    | -1.9 | -1.55 | 1 | 1 | 1    | 1    | 1    |
| 200598_s_at | no response | TRA1          | 1 | 1    | 1    | 1    | 1.87  | 1 | 1 | 1    | 1    | 1    |
| 205599_at   | no response | TRAF1         | 1 | 1    | 3.76 | 5.47 | 5.76  | 1 | 1 | 1    | 1    | 1    |
| 208315_x_at | no response | TRAF3         | 1 | 1    | 1    | 1.89 | 1     | 1 | 1 | 1    | 1    | 1    |
| 221571_at   | no response | TRAF3         | 1 | 1    | 1.96 | 2.42 | 2.39  | 1 | 1 | 1    | 1    | 1    |
| 217958_at   | no response | TRAPPC4       | 1 | 1    | 1    | 1    | -1.41 | 1 | 1 | 1    | 1    | 1    |
| 204341_at   | no response | TRIM16        | 1 | 1    | 1    | 2.44 | 2.12  | 1 | 1 | 1.77 | 1    | 1    |
| 208178_x_at | no response | TRIO          | 1 | 1    | 1    | 1    | 1.64  | 1 | 1 | 1    | 1.5  | 1    |
| 209013_x_at | no response | TRIO          | 1 | 1    | 1    | 1.45 | 1     | 1 | 1 | 1    | 1    | 1    |
| 202734_at   | no response | TRIP10        | 1 | 1    | 1.59 | 1.5  | 1     | 1 | 1 | 1    | 1    | 1    |
| 202656_s_at | no response | TRIP-Br2      | 1 | 1    | 1.65 | 1    | 1     | 1 | 1 | 1    | 1    | 1    |
| 202657_s_at | no response | TRIP-Br2      | 1 | 1    | 1.71 | 1    | 1     | 1 | 1 | 1    | 1    | 1    |
| 210389_x_at | no response | TUBD1         | 1 | 1    | 1.64 | 1    | 1     | 1 | 1 | 1    | 1    | 1    |
| 212872_s_at | no response | USP49         | 1 | 1    | 1    | 1    | -1.44 | 1 | 1 | 1    | 1    | 1    |

|             |             |         |   |     |       |       |       |   |   |      |   |      |
|-------------|-------------|---------|---|-----|-------|-------|-------|---|---|------|---|------|
| 203241_at   | no response | UVRAG   | 1 | 1   | 1     | 1.43  | 1     | 1 | 1 | 1    | 1 | 1    |
| 203868_s_at | no response | VCAM1   | 1 | 1   | 1     | 1.98  | 2.21  | 1 | 1 | 1    | 1 | 1    |
| 204254_s_at | no response | VDR     | 1 | 1   | 1     | 1.52  | 1     | 1 | 1 | 1.63 | 1 | 1.94 |
| 205019_s_at | no response | VIPR1   | 1 | 1   | 1     | -1.51 | 1     | 1 | 1 | 1    | 1 | 1    |
| 210285_x_at | no response | WTAP    | 1 | 1   | 1     | 1     | 1.66  | 1 | 1 | 1    | 1 | 1    |
| 219779_at   | no response | ZFH4    | 1 | 1   | 1     | -1.59 | -1.46 | 1 | 1 | 1    | 1 | 1    |
| 201367_s_at | no response | ZFP36L2 | 1 | 1   | 1.82  | 1     | 1     | 1 | 1 | 1    | 1 | 1    |
| 201368_at   | no response | ZFP36L2 | 1 | 1.4 | 1.53  | 1     | 1     | 1 | 1 | 1    | 1 | 1    |
| 201369_s_at | no response | ZFP36L2 | 1 | 1   | 1.52  | 1     | 1     | 1 | 1 | 1    | 1 | 1    |
| 212774_at   | no response | ZNF238  | 1 | 1   | -1.62 | -1.63 | -1.66 | 1 | 1 | 1    | 1 | 1    |
| 219540_at   | no response | ZNF267  | 1 | 1   | 1     | 1.68  | 1     | 1 | 1 | 1    | 1 | 1    |
| 219848_s_at | no response | ZNF432  | 1 | 1   | -1.43 | 1     | 1     | 1 | 1 | 1    | 1 | 1    |
